# Supplementary material for: Robust fluorine effects on molecular conformations of 2-amino-2-fluorotetrahydro-2H-pyrans: fluorine-Perlin-like vs. Perlin effects
Source: Royal Society of Chemistry journal article supplement (doi:10.1039/d2nj02380f), 2022-01-01
Supplement: d2nj02380f1.pdf [file d2nj02380f1.pdf]

**SUPPORTING INFORMATION**

**Robust Fluorine Effects on Molecular Conformations of 2-Amino-2-Fluorotetrahydro-2H-Pyrans: Fluorine-Perlin-like vs Perlin Effects**

Athanassios C. Tsipis

*Laboratory of Inorganic Chemistry, Department of Chemistry, University of Ioannina, Ioannina*

*45110, Greece*

## Table of Contents

|                                                                                                                                                                                                                                                                                                                                                       |     |
|-------------------------------------------------------------------------------------------------------------------------------------------------------------------------------------------------------------------------------------------------------------------------------------------------------------------------------------------------------|-----|
| <b>Figure S1.</b> Representative rotational potential energy profiles for the 2-amino-2-fluorotetrahydro-2 <i>H</i> -pyran conformers (amino- = -NH <sub>2</sub> and NHCN) calculated at the PBE0/Def2-TZVP level of theory in the gas phase.                                                                                                         | S4  |
| <b>Table S1.</b> Free Energies, <i>G</i> (in Hartrees) of the more stable axial and equatorial rotamers of the 2-amino-2-fluorotetrahydro-2 <i>H</i> -pyran conformers and their differences $\Delta G_{ax \rightarrow eq}$ (in kcal/mol) calculated at the PBE1PBE/Def2-TZVP level of theory in the gas phase.                                       | S5  |
| <b>Table S2.</b> Free Energies, <i>G</i> (in Hartrees) of the more stable axial and equatorial rotamers of the 2-amino-tetrahydro-2 <i>H</i> -pyran conformers and their differences $\Delta G_{ax \rightarrow eq}$ (in kcal/mol) calculated at the PBE1PBE/Def2-TZVP level of theory in the gas phase.                                               | S6  |
| <b>Figure S2.</b> Equilibrium geometries of the 2-N-2-FTHP conformers along with the <i>R</i> (C-F), <i>R</i> (C-O), and <i>R</i> (C-N) bond lengths calculated at the PBE0/Def2-TZVP level of theory in the gas phase.                                                                                                                               | S7  |
| <b>Figure S3.</b> Equilibrium geometries of the 2-N-THP conformers along with the <i>R</i> (C-H), <i>R</i> (C-O), and <i>R</i> (C-N) bond lengths calculated at the PBE0/Def2-TZVP level of theory in the gas phase.                                                                                                                                  | S8  |
| <b>Table S3.</b> Total energies, <i>E</i> <sub>tot</sub> , Lewis energies, <i>E</i> <sub>Lewis</sub> (in Hartrees) and electronic delocalization contribution to the AE, $\Delta\Delta E_{deloc}$ (in kcal/mol) of the axial (equatorial) 2-amino-2-fluorotetrahydro-2 <i>H</i> -pyran conformers calculated at the PBE1PBE/Def2-TZVP level of theory | S9  |
| <b>Table S4.</b> Total energies, <i>E</i> <sub>tot</sub> , Lewis energies, <i>E</i> <sub>Lewis</sub> (in Hartrees) and electronic delocalization contribution to the AE, $\Delta\Delta E_{deloc}$ (in kcal/mol) of the axial (equatorial) 2-amino-tetrahydro-2 <i>H</i> -pyran conformers calculated at the PBE1PBE/Def2-TZVP level of theory         | S10 |
| <b>Table S5.</b> Predominant hyperconjugative interactions, $\Delta E(2)$ (in kcal/mol) contributing to the AE in the 2-amino-2-fluorotetrahydro-2 <i>H</i> -pyran conformers calculated by the NBO/PBE0/Def2-TZVP computational protocol.                                                                                                            | S11 |
| <b>Table S6.</b> Predominant hyperconjugative interactions, $\Delta E(2)$ (in kcal/mol) contributing to the AE in the 2-amino-tetrahydro-2 <i>H</i> -pyran conformers calculated by the NBO/PBE0/Def2-TZVP computational protocol.                                                                                                                    | S12 |

|                                                                                                                                                                                                                                                                                                                                                                                                                                               |     |
|-----------------------------------------------------------------------------------------------------------------------------------------------------------------------------------------------------------------------------------------------------------------------------------------------------------------------------------------------------------------------------------------------------------------------------------------------|-----|
| <b>Chart S1.</b> Acceptor capacity ladders of the $\sigma^*(\text{C-N})$ , $\sigma^*(\text{C-O})$ , $\sigma^*(\text{C-F})$ and $\sigma^*(\text{C-H})$ acceptor NBOs for the axial and equatorial 2-N-2-FTHP and 2-N-THP conformers calculated at the NBO/PBE0/Def2-TZVP level of theory in the gas phase                                                                                                                                      | S13 |
| <b>Table S7.</b> Isotropic shielding constants, $\sigma^{\text{iso}} \text{ } ^{13}\text{C}$ (in ppm) for the anomeric carbon atom and their differences $\Delta\sigma^{\text{iso}} = (\sigma^{\text{iso}})_{\text{ax}} - (\sigma^{\text{iso}})_{\text{eq}}$ of 2-amino-2-fluoro-tetrahydro-2 <i>H</i> -pyran (2-N-2-FTHP) and 2-amino-tetrahydro-2 <i>H</i> -pyran (2-N-THP) conformers calculated at the PBE1PBE/Def2-TZVP level of theory. | S14 |
| <b>Table S8.</b> Cartesian coordinates and energies of the 2-amino-2-fluorotetrahydro-2 <i>H</i> -pyran conformers                                                                                                                                                                                                                                                                                                                            | S15 |
| <b>Table S9.</b> Cartesian coordinates and energies of the 2-amino-tetrahydro-2 <i>H</i> -pyran conformers                                                                                                                                                                                                                                                                                                                                    | S31 |

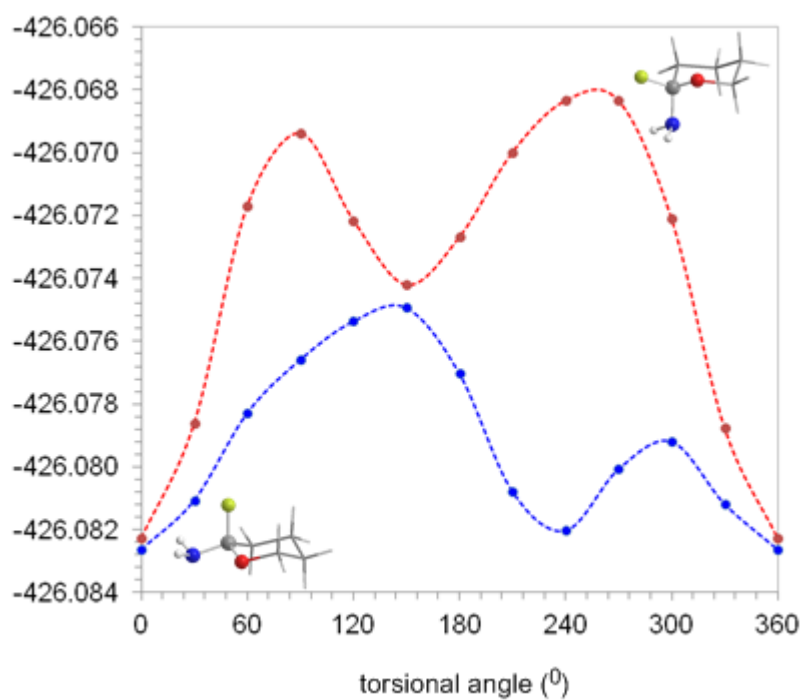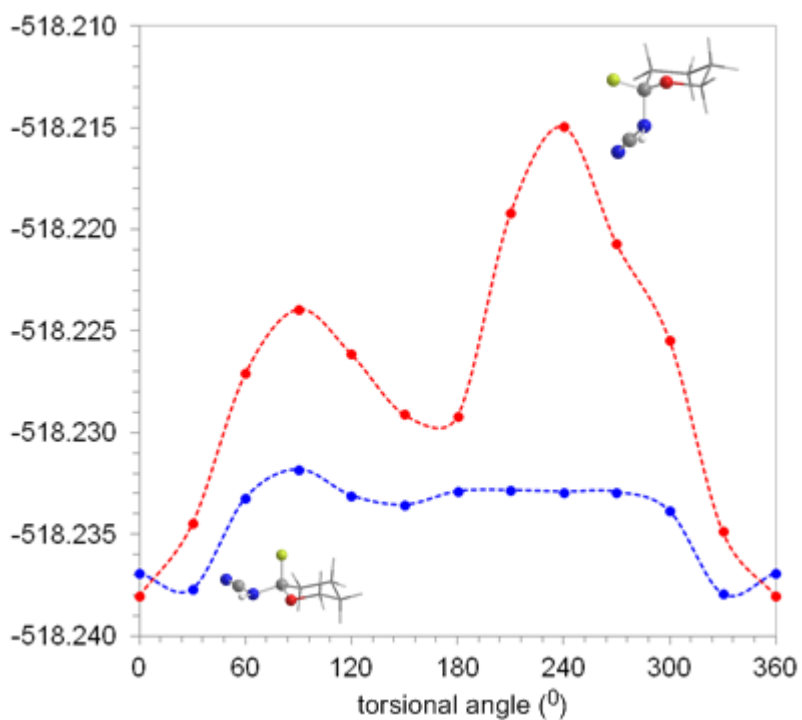

**Figure S1.** Representative rotational potential energy profiles for the 2-amino-2-fluorotetrahydro-2*H*-pyran conformers (amino- = -NH<sub>2</sub> and NHCN) calculated at the PBE0/Def2-TZVP level of theory in the gas phase.

**Table S1.** Free Energies,  $G$  (in Hartrees) of the more stable axial and equatorial rotamers of the 2-amino-2-fluorotetrahydro-2*H*-pyran (2-N-2-FTHP) conformers and their differences  $\Delta G_{\text{ax}\rightarrow\text{eq}}$  (in kcal/mol) calculated at the PBE1PBE/Def2-TZVP level of theory in the gas phase.

| Amino group        | $G_{\text{ax}}$ | $G_{\text{eq}}$ | $\Delta G_{\text{ax}\rightarrow\text{eq}}$ |
|--------------------|-----------------|-----------------|--------------------------------------------|
| NH <sub>2</sub>    | -425.957241     | -425.959719     | -1.55                                      |
| NF <sub>2</sub>    | -624.220272     | -624.221906     | -1.03                                      |
| NCl <sub>2</sub>   | -1344.819525    | -1344.818975    | 0.35                                       |
| NHMe               | -465.198006     | -465.200090     | -1.31 <sup>a</sup>                         |
| NH <sup>t</sup> Bu | -582.953249     | -582.956401     | -1.97                                      |
| NHCF <sub>3</sub>  | -762.832395     | -762.833353     | -0.60                                      |
| NHPh               | -656.732634     | -656.734443     | -1.14                                      |
| NHF                | -525.082482     | -525.082042     | 0.28                                       |
| NHCl               | -885.390432     | -885.390326     | 0.07                                       |
| NHBr               | -2999.193719    | -2.999.194471   | -0.47                                      |
| NHCN               | -518.117802     | -518.120185     | -1.50                                      |
| NHNH <sub>2</sub>  | -481.218493     | -481.218537     | -0.03                                      |
| NHOH               | -501.072444     | -501.073361     | -0.58                                      |
| NMeF               | -564.330919     | -564.330507     | 0.26                                       |
| NMe <sub>2</sub>   | -504.437431     | -504.439992     | -1.61                                      |

<sup>a</sup> Experimental  $\Delta G_{\text{ax}\rightarrow\text{eq}}$  value of -1.57 kcal/mol [5] and Calculated  $\Delta H_{\text{ax}\rightarrow\text{eq}}$  value of -1.90 kcal/mol (expt -2.11 kcal/mol [4], -1.75 kcal/mol [5])

**Table S2.** Free Energies,  $G$  (in Hartrees) of the more stable axial and equatorial rotamers of the 2-amino-tetrahydropyran (2-N-THP) conformers and their differences  $\Delta G_{\text{ax}\rightarrow\text{eq}}$  ( $A$ -values in kcal/mol) calculated at the PBE1PBE/Def2-TZVP level of theory in the gas phase.

| Amino group        | $G_{\text{ax}}$ | $G_{\text{eq}}$ | $\Delta G_{\text{ax}\rightarrow\text{eq}}(A\text{-values})$ |
|--------------------|-----------------|-----------------|-------------------------------------------------------------|
| NH <sub>2</sub>    | -326.73423      | -326.74020      | -3.74                                                       |
| NF <sub>2</sub>    | -525.011542     | -525.009108     | 1.53                                                        |
| NCl <sub>2</sub>   | -1245.607368    | -1245.608632    | -0.79                                                       |
| NHMe               | -365,97706      | -365,97875      | -1,06                                                       |
| NH <sup>t</sup> Bu | -483.72972      | -483.73264      | -1.83                                                       |
| NHCF <sub>3</sub>  | -663.61560      | -663.61727      | -1.05                                                       |
| NHPh               | -557.51744      | -557.51341      | 2.53                                                        |
| NHF                | -425.86482      | -425.86860      | -2.37                                                       |
| NHCl               | -786.17288      | -786.17543      | -1.60                                                       |
| NHBr               | -2899.97608     | -2899.97609     | -0.01                                                       |
| NHCN               | -418.90139      | -418.90138      | 0.00                                                        |
| NHNH <sub>2</sub>  | -381.99602      | -382.00059      | -2.87                                                       |
| NHOH               | -401.85385      | -401.85656      | -1.70                                                       |
| NMeF               | -465.11522      | -465.11654      | -0.83                                                       |
| NMe <sub>2</sub>   | -405,21780      | -405,22201      | -2,64                                                       |

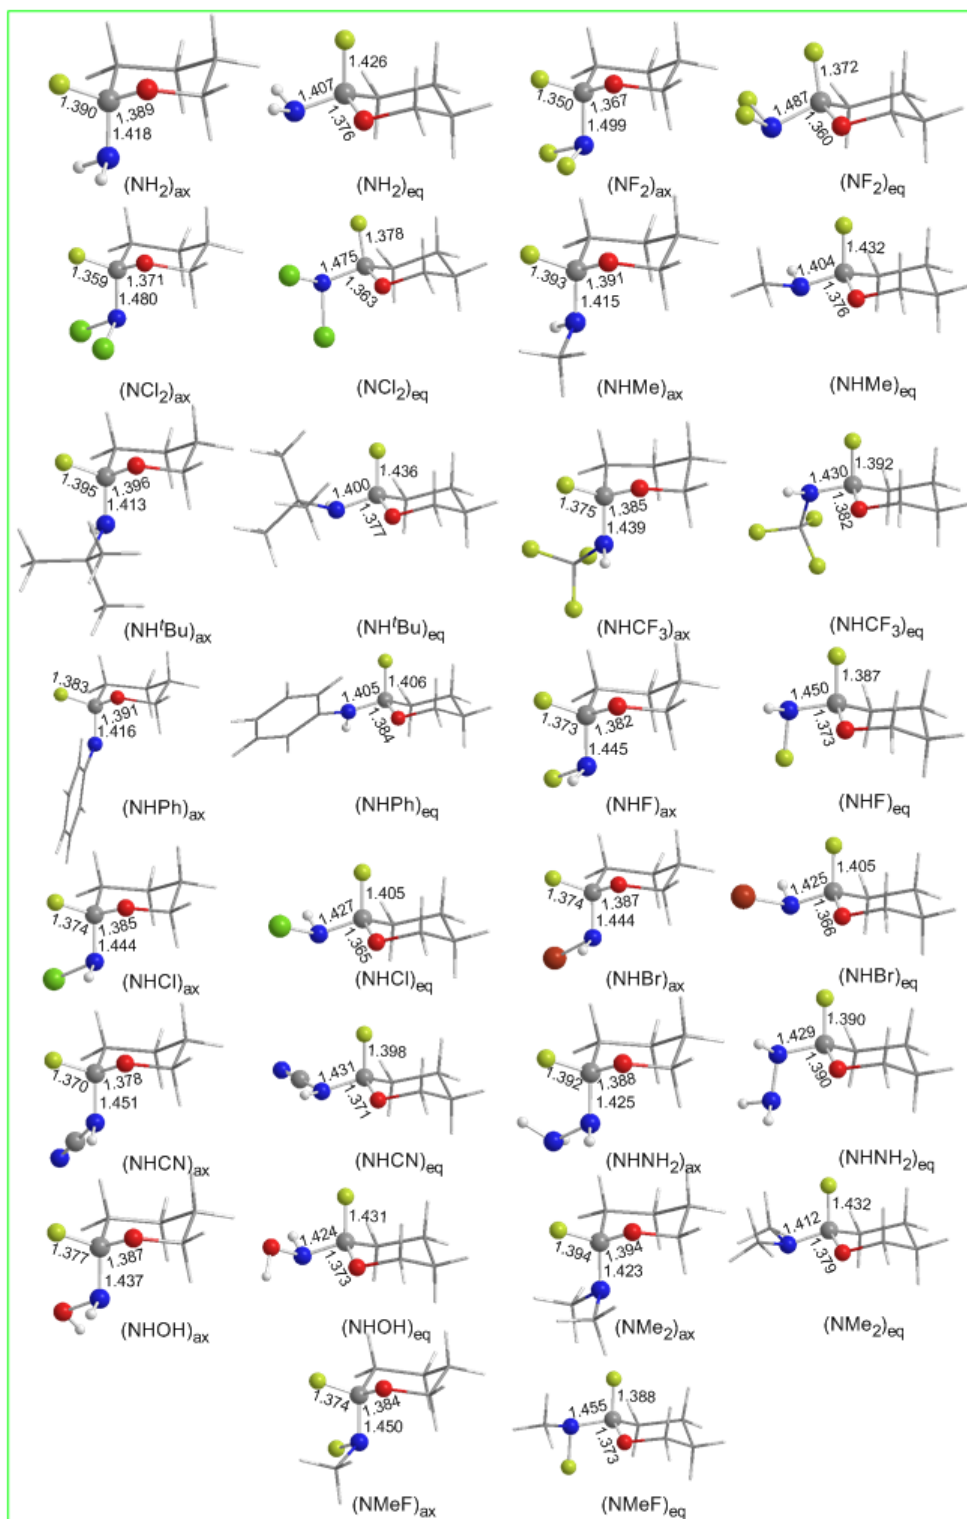

**Figure S2** Equilibrium geometries of the stable rotamers of 2-N-2-FTHP conformers along with the  $R(C-F)$ ,  $R(C-N)$  and  $R(C-O)$  bond lengths (in Å) calculated at the PBE0/Def2-TZVP level of theory in the gas phase

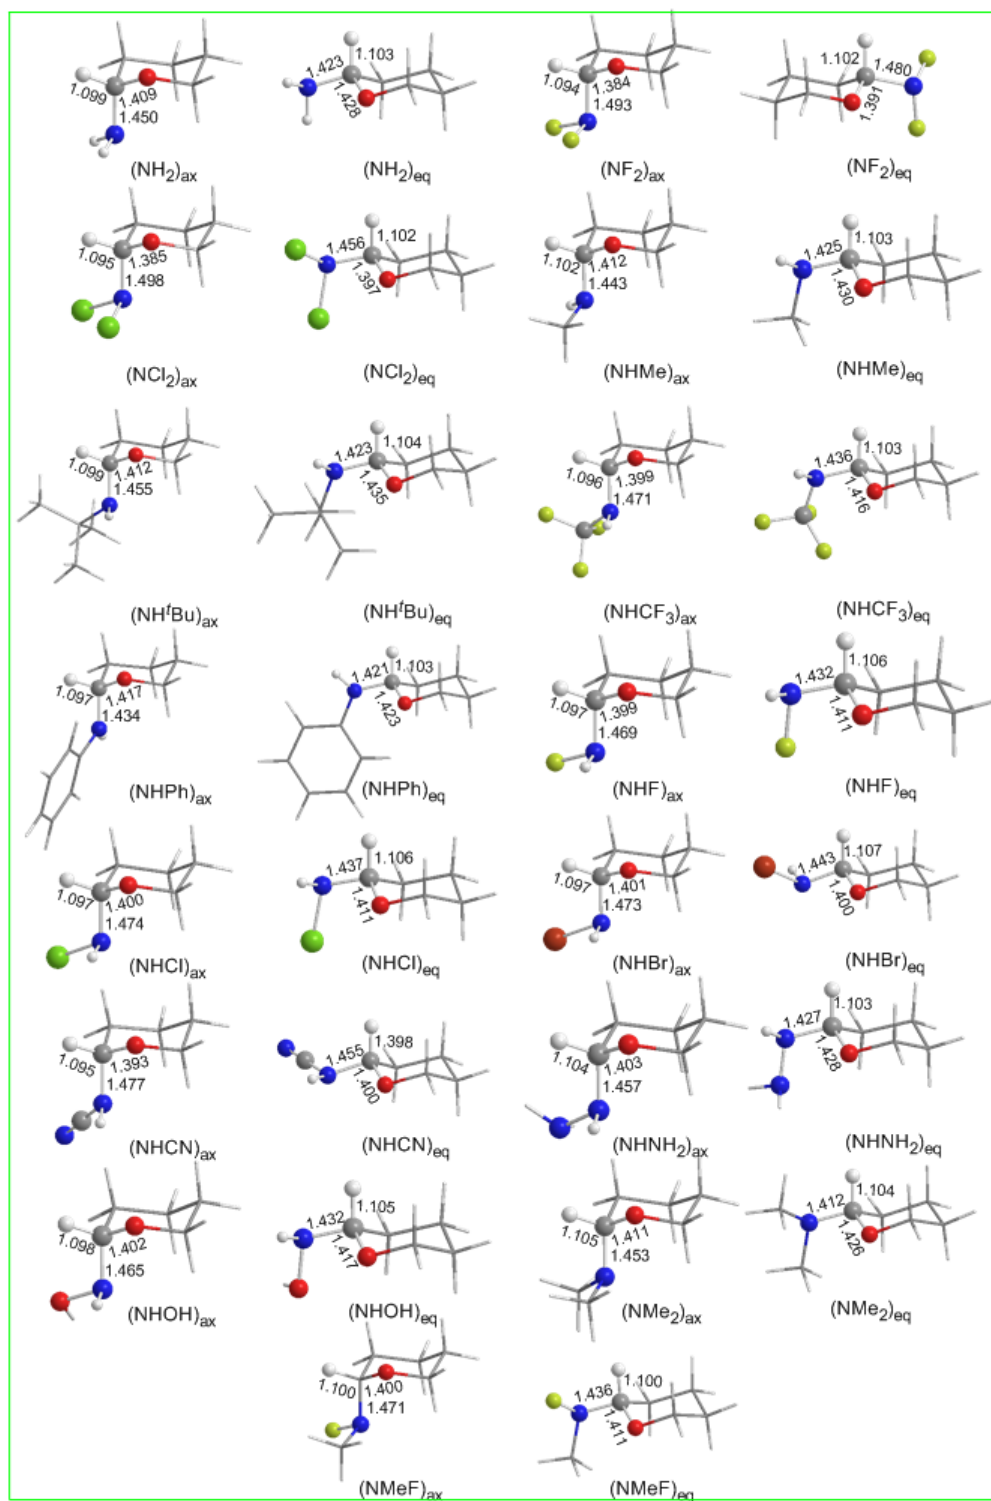

**Figure S3** Equilibrium geometries of the stable rotamers of 2-N-THP conformers along with the  $R(\text{C-H})$ ,  $R(\text{C-N})$  and  $R(\text{C-O})$  bond lengths (in Å) calculated at the PBE0/Def2-TZVP level of theory in the gas phase



**Table S3.** Total energies,  $E_{\text{tot}}$ , Lewis energies,  $E_{\text{Lewis}}$  (in Hartrees) and electronic delocalization contribution to the AE,  $\Delta\Delta E_{\text{deloc}}$  (in kcal/mol) of the axial (equatorial) 2-amino-2-fluorotetrahydro-2H-pyran conformers calculated at the PBE1PBE/Def2-TZVP level of theory.

| Amino group        | $E_{\text{tot}}$            | $E_{\text{Lewis}}$          | $\Delta E_{\text{tot}}^{\text{a}}$ | $\Delta E_{\text{Lewis}}^{\text{b}}$ | $\Delta\Delta E_{\text{deloc}}$ |
|--------------------|-----------------------------|-----------------------------|------------------------------------|--------------------------------------|---------------------------------|
| NH <sub>2</sub>    | -426.082278 (-426.084571)   | -425.310243 (-425.318590)   | -1.439                             | -5.238                               | 3.799                           |
| NF <sub>2</sub>    | -624.324853 (-624.326471)   | -623.348364 (-623.363461)   | -1.015                             | -9.474                               | 8.459                           |
| NCl <sub>2</sub>   | -1344.919869 (-1344.919254) | -1343.983498 (-1343.991413) | 0.386                              | -4.967                               | 5.353                           |
| NHMe               | -465.348817 (-465.350875)   | -464.487147 (-464.492323)   | -1.291                             | -3.248                               | 1.957                           |
| NH <sup>t</sup> Bu | -583.183507 (-583.186441)   | -582.095257 (-582.097986)   | -1.841                             | -1.712                               | -0.129                          |
| NHCF <sub>3</sub>  | -762.956971 (-762.957503)   | -761.480950 (-761.484217)   | -0.334                             | -2.050                               | 1.716                           |
| NHPh               | -656.930856 (-656.931702)   | -655.379810 (-655.376995)   | -0.531                             | 1.766                                | -2.297                          |
| NHF                | -525.197544 (-525.196889)   | -524.361018 (-524.378198)   | 0.411                              | -10.781                              | 11.192                          |
| NHCl               | -885.503318 (-885.503092)   | -884.673080 (-884.666173)   | 0.142                              | 4.335                                | -4.193                          |
| NHBr               | -2999.304910 (-2999.305532) | -2998.477013 (-2998.476366) | -0.390                             | 0.406                                | -0.796                          |
| NHCN               | -518.238018 (-518.240199)   | -517.175640 (-517.181899)   | -1.369                             | -3.928                               | 2.559                           |
| NHNH <sub>2</sub>  | -481.359280 (-481.359181)   | -480.503387 (-480.508412)   | 0.062                              | -3.153                               | 3.215                           |
| NHOH               | -501.200235 (-501.200928)   | -500.364896 (-500.366828)   | -0.435                             | -1.212                               | 0.777                           |
| NMeF               | -564.471846 (-564.471298)   | -563.536136 (-563.543929)   | 0.345                              | -4.890                               | 5.235                           |
| NMe <sub>2</sub>   | -504.614741 (-504.616899)   | -503.653067 (-503.651522)   | -1.354                             | 0.970                                | -2.324                          |

<sup>a</sup>  $\Delta E_{\text{total}} = (E_{\text{tot}})_{\text{eq}} - (E_{\text{tot}})_{\text{ax}}$ . <sup>b</sup>  $\Delta E_{\text{Lewis}} = (E_{\text{Lewis}})_{\text{eq}} - (E_{\text{Lewis}})_{\text{ax}}$ . <sup>c</sup>  $\Delta\Delta E_{\text{deloc}} = \Delta E_{\text{total}} - \Delta E_{\text{Lewis}}$

**Table S4.** Total energies.  $E_{\text{tot}}$ . Lewis energies.  $E_{\text{Lewis}}$  (in Hartrees) and electronic delocalization contribution to the AE.  $\Delta\Delta E_{\text{deloc}}$  (in kcal/mol) of the axial (equatorial) 2-amino-tetrahydro-2*H*-pyran conformers calculated at the PBE1PBE/Def2-TZVP level of theory.

| Amino group        | $E_{\text{tot}}$            | $E_{\text{Lewis}}$          | $\Delta E_{\text{tot}}^{\text{a}}$ | $\Delta E_{\text{Lewis}}^{\text{b}}$ | $\Delta\Delta E_{\text{deloc}}^{\text{c}}$ |
|--------------------|-----------------------------|-----------------------------|------------------------------------|--------------------------------------|--------------------------------------------|
| NH <sub>2</sub>    | -326.868173 (-326.873995)   | -326.301484 (-326.298759)   | -3.65                              | 1.71                                 | -5.36                                      |
| NF <sub>2</sub>    | -525.125181 (-525.122555)   | -524.379643 (-524.373060)   | 1.65                               | 4.13                                 | -2.48                                      |
| NCl <sub>2</sub>   | -1245.716713 (-1245.717724) | -1245.015518 (-1245.006894) | -0.63                              | 5.41                                 | -6.05                                      |
| NHMe               | -366.136827 (-366.138541)   | -365.480949 (-365.471945)   | -1.08                              | 5.65                                 | -6.73                                      |
| NH <sup>i</sup> Bu | -483.969197 (-483.97199)    | -483.110098 (-483.085945)   | -1.75                              | 15.16                                | -16.91                                     |
| NHCF <sub>3</sub>  | -663.749233 (-663.750632)   | -662.492253 (-662.473424)   | -0.88                              | 11.82                                | -12.69                                     |
| NHPh               | -557.724795 (-557.720530)   | -556.372629 (-556.359216)   | 2.68                               | 8.42                                 | -5.74                                      |
| NHF                | -425.988931 (-425.992458)   | -425.366808 (-425.347308)   | -2.21                              | 12.24                                | -14.45                                     |
| NHCl               | -786.294908 (-786.297054)   | -785.684336 (-785.669159)   | -1.35                              | 9.52                                 | -10.87                                     |
| NHBr               | -2900.096398 (-2900.095827) | -2899.489750 (-2899.482377) | 0.36                               | 4.63                                 | -4.27                                      |
| NHCN               | -419.030638 (-419.029999)   | -418.168638 (-418.179634)   | 0.40                               | -6.90                                | 7.30                                       |
| NHNH <sub>2</sub>  | -382.145763 (-382.150172)   | -381.489587 (-381.490142)   | -2.77                              | -0.35                                | -2.42                                      |
| NHOH               | -401.990644 (-401.993139)   | -401.369253 (-401.348174)   | -1.57                              | 13.23                                | -14.79                                     |
| NMeF               | -465.264970 (-465.266252)   | -464.546613 (-464.535002)   | -0.80                              | 7.29                                 | -8.09                                      |
| NMe <sub>2</sub>   | -405.404057 (-405.407646)   | -404.653691 (-404.646839)   | -2.25                              | 4.30                                 | -6.55                                      |

<sup>a</sup>  $\Delta E_{\text{total}} = (E_{\text{tot}})_{\text{eq}} - (E_{\text{tot}})_{\text{ax}}$ . <sup>b</sup>  $\Delta E_{\text{Lewis}} = (E_{\text{Lewis}})_{\text{eq}} - (E_{\text{Lewis}})_{\text{ax}}$ . <sup>c</sup>  $\Delta\Delta E_{\text{deloc}} = \Delta E_{\text{total}} - \Delta E_{\text{Lewis}}$

**Table S5.** Predominant hyperconjugative interactions,  $\Delta E(2)$  (in kcal/mol) contributing to the AE in the 2-amino-2-fluorotetrahydro-2*H*-pyran conformers calculated by the NBO/PBE0/Def2-TZVP computational protocol.

| Amino group       | $n_{\text{O}} \rightarrow \sigma^*(\text{C-F})$ |                    | $n_{\text{O}} \rightarrow \sigma^*(\text{C-N})$ |                    | $n_{\text{N}} \rightarrow \sigma^*(\text{C-F})$ |                    | $n_{\text{N}} \rightarrow \sigma^*(\text{C-O})$ |                    | $n_{\text{F}} \rightarrow \sigma^*(\text{C-O})$ |                    | $n_{\text{F}} \rightarrow \sigma^*(\text{C-N})$ |                    |
|-------------------|-------------------------------------------------|--------------------|-------------------------------------------------|--------------------|-------------------------------------------------|--------------------|-------------------------------------------------|--------------------|-------------------------------------------------|--------------------|-------------------------------------------------|--------------------|
|                   | $\Delta E(2)_{ax}$                              | $\Delta E(2)_{eq}$ |
| NH <sub>2</sub>   | 5.35                                            | 20.83              | 12.35                                           | 2.15               | 18.42                                           | 20.83              | 1.98                                            | 1.13               | 10.85                                           | 11.70              | 10.12                                           | 8.66               |
| NF <sub>2</sub>   | 6.13                                            | 23.01              | 16.97                                           | 3.79               | 6.29                                            | 7.05               | 0.53                                            | -                  | 12.88                                           | 12.65              | 15.44                                           | 11.46              |
| NCl <sub>2</sub>  | 6.07                                            | 22.65              | 16.77                                           | 2.61               | 9.92                                            | 1.58               | 0.81                                            | 8.69               | 12.55                                           | 12.64              | 13.82                                           | 10.71              |
| NHF               | 6.15                                            | 22.00              | 12.35                                           | 3.03               | 11.74                                           | 1.62               | 0.93                                            | 9.39               | 11.82                                           | 11.75              | 11.93                                           | 8.87               |
| NHCl              | 6.14                                            | 21.91              | 12.39                                           | 2.35               | 13.48                                           | 15.86              | 1.07                                            | 1.49               | 11.82                                           | 11.70              | 11.77                                           | 8.68               |
| NHBr              | 6.18                                            | 21.73              | 12.21                                           | 2.12               | 13.89                                           | 15.81              | 0.94                                            | 1.39               | 11.87                                           | 11.41              | 11.59                                           | 9.88               |
| NHOH              | 5.87                                            | 20.69              | 11.82                                           | 2.48               | 13.72                                           | 16.15              | 1.06                                            | 1.88               | 11.59                                           | 11.68              | 11.32                                           | 8.59               |
| NHNH <sub>2</sub> | 5.81                                            | 19.91              | 12.17                                           | 2.36               | 17.89                                           | 2.02               | 1.25                                            | 13.48              | 10.45                                           | 11.91              | 9.82                                            | 8.48               |
| NHCN              | 6.03                                            | 21.20              | 14.67                                           | 2.71               | 15.27                                           | 19.37              | 2.72                                            | 1.69               | 11.80                                           | 11.69              | 12.04                                           | 10.58              |
| NHCF <sub>3</sub> | 6.02                                            | 20.20              | 13.37                                           | 2.68               | 16.88                                           | 8.13               | 2.43                                            | 11.50              | 11.14                                           | 11.69              | 11.59                                           | 9.22               |
| MHMe              | 5.27                                            | 20.81              | 12.59                                           | 2.03               | 20.81                                           | 24.15              | 3.19                                            | 2.45               | 10.73                                           | 11.78              | 9.93                                            | 8.09               |
| NMeF              | 5.92                                            | 21.99              | 12.58                                           | 2.85               | 14.00                                           | 1.82               | 1.30                                            | 11.06              | 11.85                                           | 11.87              | 12.03                                           | 9.06               |
| NMe <sub>2</sub>  | 5.18                                            | 20.58              | 12.20                                           | 1.99               | 20.57                                           | 24.82              | 3.26                                            | 2.57               | 10.87                                           | 10.35              | 9.74                                            | 8.22               |

**Table S6.** Predominant hyperconjugative interactions,  $\Delta E(2)$  (in kcal/mol) contributing to the AE in the 2-amino-tetrahydro-2*H*-pyran conformers calculated by the NBO/PBE0/Def2-TZVP computational protocol.

| Amino group       | $n_{\text{O}} \rightarrow \sigma^*(\text{C-H})$ |                    | $n_{\text{O}} \rightarrow \sigma^*(\text{C-N})$ |                    | $n_{\text{N}} \rightarrow \sigma^*(\text{C-H})$ |                    | $n_{\text{N}} \rightarrow \sigma^*(\text{C-O})$ |                    |
|-------------------|-------------------------------------------------|--------------------|-------------------------------------------------|--------------------|-------------------------------------------------|--------------------|-------------------------------------------------|--------------------|
|                   | $\Delta E(2)_{ax}$                              | $\Delta E(2)_{eq}$ |
| NH <sub>2</sub>   | 3.03                                            | 8.08               | 11.57                                           | 1.93               | 7.81                                            | 1.57               | 3.87                                            | 14.85              |
| NF <sub>2</sub>   | 3.06                                            | 10.19              | 15.38                                           | 3.69               | 2.90                                            | -                  | 0.70                                            | 1.13               |
| NCl <sub>2</sub>  | 3.13                                            | 9.63               | 16.10                                           | 2.32               | 4.16                                            | 0.67               | 0.85                                            | 9.44               |
| NHF               | 2.99                                            | 9.36               | 11.84                                           | 2.59               | 5.05                                            | 0.83               | -                                               | 11.15              |
| NHCl              | 2.99                                            | 9.12               | 12.59                                           | 2.23               | 5.52                                            | 0.93               | -                                               | 11.82              |
| NHBr              | 2.96                                            | 8.78               | 12.46                                           | 2.06               | 5.48                                            | 6.65               | -                                               | 3.64               |
| NHOH              | 3.00                                            | 8.83               | 11.97                                           | 2.36               | 5.77                                            | 0.99               | -                                               | 12.32              |
| NHNH <sub>2</sub> | 2.95                                            | 8.30               | 11.80                                           | 2.18               | 7.93                                            | 0.13               | 0.57                                            | 14.43              |
| NHCN              | 3.22                                            | 7.54               | 14.10                                           | 2.79               | 6.52                                            | 8.22               | 3.39                                            | 1.75               |
| NHCF <sub>3</sub> | 3.16                                            | 8.36               | 12.78                                           | 2.33               | 6.97                                            | 2.48               | 1.55                                            | 13.78              |
| MHMe              | 2.85                                            | 7.88               | 11.47                                           | 1.85               | 8.67                                            | 1.29               | 5.25                                            | 16.36              |
| NMeF              | 2.85                                            | 8.54               | 12.60                                           | 2.42               | 6.00                                            | 0.77               | 0.98                                            | 12.31              |
| NMe <sub>2</sub>  | 2.78                                            | 7.78               | 11.43                                           | 1.81               | 8.70                                            | 1.23               | 3.42                                            | 16.87              |

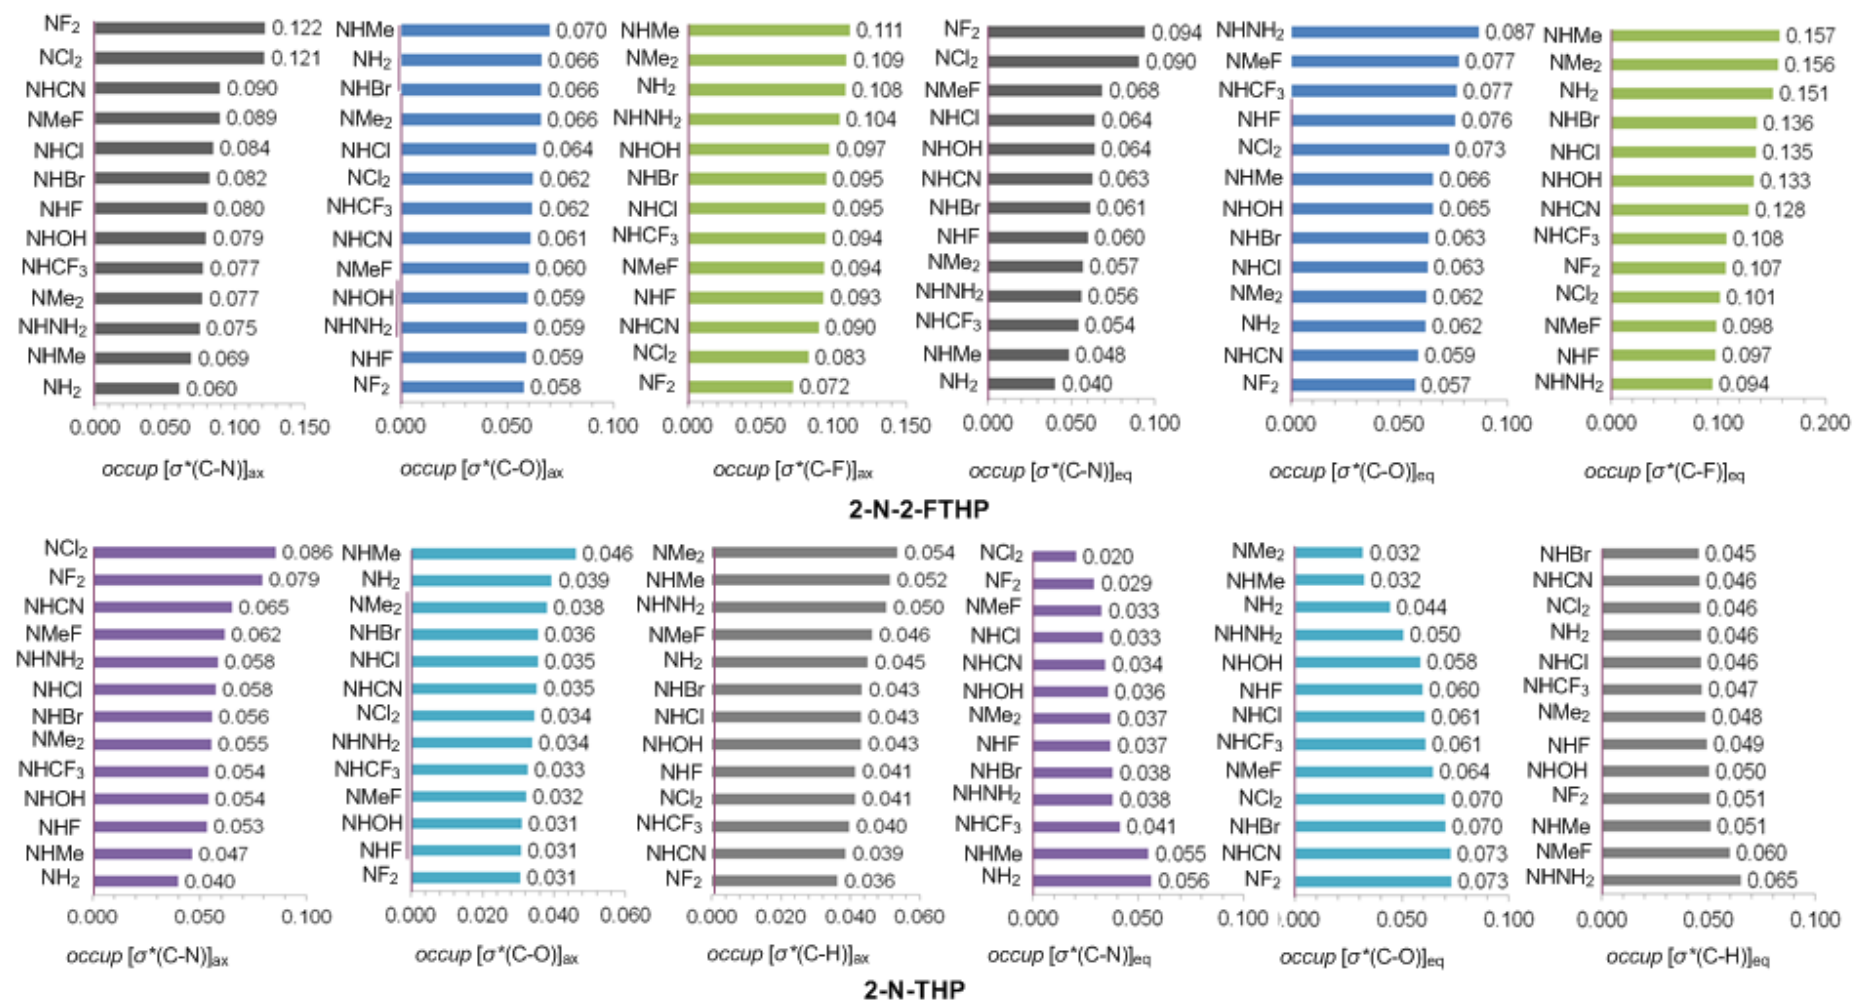

**Chart S1.** Acceptor capacity ladders of the  $\sigma^*(\text{C-N})$ ,  $\sigma^*(\text{C-O})$ ,  $\sigma^*(\text{C-F})$  and  $\sigma^*(\text{C-H})$  acceptor NBOs for the axial and equatorial 2-N-2-FTHP and 2-N-THP conformers calculated at the NBO/PBE0/Def2-TZVP level of theory in the gas phase

**Table S7.** Isotropic shielding constants,  $\sigma^{\text{iso } ^{13}\text{C}}$  (in ppm) for the anomeric carbon atom and their differences  $\Delta\sigma^{\text{iso}} = (\sigma^{\text{iso}})_{\text{ax}} - (\sigma^{\text{iso}})_{\text{eq}}$  of 2-amino-2-fluoro-tetrahydro-2*H*-pyran (2-N-2-FTHP) and 2-amino-tetrahydro-2*H*-pyran (2-N-THP) conformers calculated at the PBE1PBE/Def2-TZVP level of theory.

| Amino substituent | <b>2-N-2-FTHP</b>                                  |                                                    | $\Delta\sigma^{\text{iso } ^{13}\text{C}}$ | <b>2-N-THP</b>                                     |                                                    | $\Delta\sigma^{\text{iso } ^{13}\text{C}}$ |
|-------------------|----------------------------------------------------|----------------------------------------------------|--------------------------------------------|----------------------------------------------------|----------------------------------------------------|--------------------------------------------|
|                   | $(\sigma^{\text{iso } ^{13}\text{C}})_{\text{ax}}$ | $(\sigma^{\text{iso } ^{13}\text{C}})_{\text{eq}}$ |                                            | $(\sigma^{\text{iso } ^{13}\text{C}})_{\text{ax}}$ | $(\sigma^{\text{iso } ^{13}\text{C}})_{\text{eq}}$ |                                            |
| NH <sub>2</sub>   | 68.62                                              | 70.24                                              | -1.62                                      | 106.65                                             | 100.40                                             | 6.10                                       |
| NF <sub>2</sub>   | 66.08                                              | 64.96                                              | 1.12                                       | 91.52                                              | 87.00                                              | 4.52                                       |
| NCl <sub>2</sub>  | 63.95                                              | 63.49                                              | 0.46                                       | 86.99                                              | 83.54                                              | 3.45                                       |
| NHMe              | 67.66                                              | 67.06                                              | 0.60                                       | 99.74                                              | 96.76                                              | 2.98                                       |
| NHCF <sub>3</sub> | 71.10                                              | 71.30                                              | -0.20                                      | 105.92                                             | 101.05                                             | 4.87                                       |
| NHF               | 67.31                                              | 67.45                                              | -0.14                                      | 100.63                                             | 94.47                                              | 6.16                                       |
| NHCl              | 66.36                                              | 68.40                                              | -2.04                                      | 97.24                                              | 95.32                                              | 1.92                                       |
| NHBr              | 66.26                                              | 68.76                                              | -2.50                                      | 96.89                                              | 90.30                                              | 6.59                                       |
| NHCN              | 68.76                                              | 69.54                                              | -0.78                                      | 103.46                                             | 98.57                                              | 4.89                                       |
| NHNH <sub>2</sub> | 65.14                                              | 66.49                                              | -1.35                                      | 95.94                                              | 94.74                                              | 1.20                                       |
| NHOH              | 66.56                                              | 66.72                                              | -0.16                                      | 100.13                                             | 94.42                                              | 5.71                                       |
| NMeF              | 65.98                                              | 66.92                                              | -0.94                                      | 93.26                                              | 92.44                                              | 0.82                                       |
| NMe <sub>2</sub>  | 65.45                                              | 65.38                                              | 0.07                                       | 95.49                                              | 90.99                                              | 4.50                                       |

**Table S8.** Cartesian coordinates and energies of the 2-amino-2-fluorotetrahydro-2*H*-pyran conformers

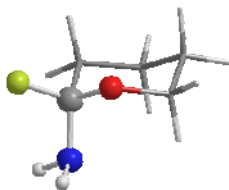

|   |              |              |              |
|---|--------------|--------------|--------------|
| C | -1.168090000 | 1.193453000  | 1.095857000  |
| O | -2.517061000 | 1.158045000  | 0.648550000  |
| H | 0.789507000  | 1.705153000  | 0.395010000  |
| H | -0.855245000 | 0.187891000  | 1.402245000  |
| C | -2.719467000 | 0.391245000  | -0.492192000 |
| H | -1.177077000 | 1.836405000  | 1.977145000  |
| N | -2.552328000 | -0.983422000 | -0.188475000 |
| C | -1.846080000 | 0.834667000  | -1.653234000 |
| C | -0.381014000 | 0.898150000  | -1.243765000 |
| C | -0.239632000 | 1.727063000  | 0.024552000  |
| F | -4.039152000 | 0.667918000  | -0.830541000 |
| H | -2.000644000 | 0.161696000  | -2.500873000 |
| H | -2.203045000 | 1.823920000  | -1.950086000 |
| H | 0.216481000  | 1.320937000  | -2.055574000 |
| H | -0.008090000 | -0.114651000 | -1.061790000 |
| H | -0.491139000 | 2.773072000  | -0.181624000 |
| H | -3.170511000 | -1.246955000 | 0.569148000  |
| H | -2.738726000 | -1.566184000 | -0.993244000 |

*Sum of electronic and zero-point Energies=* -425.926208  
*Sum of electronic and thermal Energies=* -425.918949  
*Sum of electronic and thermal Enthalpies=* -425.918005  
*Sum of electronic and thermal Free Energies=* -425.957241

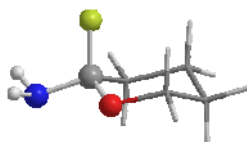

|   |              |              |              |
|---|--------------|--------------|--------------|
| C | -0.802731000 | 2.271178000  | 1.077517000  |
| C | -2.298702000 | 2.545893000  | 1.060141000  |
| H | -0.591469000 | 1.439448000  | 1.756650000  |
| H | -0.266222000 | 3.142746000  | 1.460656000  |
| C | -3.052617000 | 1.415515000  | 0.381211000  |
| H | -2.515601000 | 3.455290000  | 0.494142000  |
| H | -2.692629000 | 2.676745000  | 2.071106000  |
| N | -4.418676000 | 1.702289000  | 0.208213000  |
| O | -2.554258000 | 1.087050000  | -0.858669000 |
| C | -1.164784000 | 0.780131000  | -0.879003000 |
| C | -0.332072000 | 1.917537000  | -0.326089000 |
| H | 0.721897000  | 1.624743000  | -0.326213000 |
| F | -2.881134000 | 0.271819000  | 1.215430000  |
| H | -0.933403000 | 0.583950000  | -1.926576000 |
| H | -0.987939000 | -0.139195000 | -0.309193000 |
| H | -0.429597000 | 2.788186000  | -0.983775000 |
| H | -4.873345000 | 0.944472000  | -0.285693000 |
| H | -4.871716000 | 1.847702000  | 1.099646000  |

*Sum of electronic and zero-point Energies=* -425.928621  
*Sum of electronic and thermal Energies=* -425.921275  
*Sum of electronic and thermal Enthalpies=* -425.920331  
*Sum of electronic and thermal Free Energies=* -425.959719

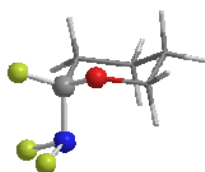

|   |              |              |              |
|---|--------------|--------------|--------------|
| C | -0.842134000 | 1.526081000  | 1.120518000  |
| O | -2.201050000 | 1.454200000  | 0.678128000  |
| H | 1.101432000  | 2.052124000  | 0.410203000  |
| H | -0.514484000 | 0.533576000  | 1.448557000  |
| C | -2.418274000 | 0.747066000  | -0.471644000 |
| H | -0.872865000 | 2.181090000  | 1.990927000  |
| N | -2.188629000 | -0.698563000 | -0.150285000 |
| C | -1.530205000 | 1.152194000  | -1.630463000 |
| C | -0.065741000 | 1.221607000  | -1.219059000 |
| C | 0.072072000  | 2.061702000  | 0.041440000  |
| F | -3.716531000 | 0.932854000  | -0.790778000 |
| H | -1.694561000 | 0.475118000  | -2.468541000 |
| H | -1.888848000 | 2.141964000  | -1.926267000 |
| H | 0.524444000  | 1.642138000  | -2.036309000 |
| H | 0.317378000  | 0.212894000  | -1.035770000 |
| H | -0.189222000 | 3.103622000  | -0.171484000 |
| F | -3.142744000 | -1.028937000 | 0.779750000  |
| F | -2.596236000 | -1.400028000 | -1.269724000 |

*Sum of electronic and zero-point Energies=* -624.186450  
*Sum of electronic and thermal Energies=* -624.177661  
*Sum of electronic and thermal Enthalpies=* -624.176717  
*Sum of electronic and thermal Free Energies=* -624.220272

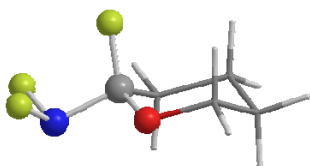

|   |              |              |              |
|---|--------------|--------------|--------------|
| C | -0.840573000 | 2.228641000  | 1.092200000  |
| C | -2.344204000 | 2.469330000  | 1.051329000  |
| H | -0.622128000 | 1.373348000  | 1.739510000  |
| H | -0.342000000 | 3.095484000  | 1.531090000  |
| C | -3.021638000 | 1.334158000  | 0.313334000  |
| H | -2.565490000 | 3.394677000  | 0.515569000  |
| H | -2.776828000 | 2.541871000  | 2.050152000  |
| N | -4.479969000 | 1.627050000  | 0.203887000  |
| O | -2.510732000 | 1.060987000  | -0.912990000 |
| C | -1.101832000 | 0.813847000  | -0.932209000 |
| C | -0.325994000 | 1.955358000  | -0.313668000 |
| H | 0.736945000  | 1.699094000  | -0.300703000 |
| F | -2.996655000 | 0.208903000  | 1.100798000  |
| H | -0.858185000 | 0.675515000  | -1.985155000 |
| H | -0.900474000 | -0.125673000 | -0.405345000 |
| H | -0.439237000 | 2.849709000  | -0.935272000 |
| F | -4.565584000 | 2.698576000  | -0.665415000 |
| F | -5.015921000 | 0.596723000  | -0.529012000 |

*Sum of electronic and zero-point Energies=* -624.188084  
*Sum of electronic and thermal Energies=* -624.179275  
*Sum of electronic and thermal Enthalpies=* -624.178331  
*Sum of electronic and thermal Free Energies=* -624.221906



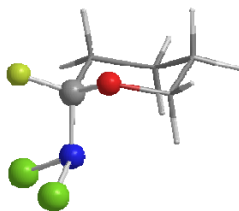

|    |              |              |              |
|----|--------------|--------------|--------------|
| C  | 1.777885000  | -1.288257000 | -0.444727000 |
| O  | 0.896368000  | -1.115499000 | 0.667532000  |
| H  | 3.374141000  | -0.289136000 | -1.453377000 |
| H  | 1.187780000  | -1.389524000 | -1.362062000 |
| C  | 0.179148000  | 0.052322000  | 0.677960000  |
| H  | 2.278405000  | -2.237250000 | -0.252736000 |
| N  | -0.785951000 | 0.000500000  | -0.443124000 |
| C  | 1.064190000  | 1.283430000  | 0.568555000  |
| C  | 2.015184000  | 1.180517000  | -0.614653000 |
| C  | 2.760783000  | -0.144335000 | -0.559693000 |
| F  | -0.470648000 | 0.066203000  | 1.871186000  |
| H  | 0.454535000  | 2.184564000  | 0.531492000  |
| H  | 1.624411000  | 1.301532000  | 1.507582000  |
| H  | 2.713152000  | 2.020832000  | -0.598237000 |
| H  | 1.450166000  | 1.251876000  | -1.549267000 |
| H  | 3.433919000  | -0.157831000 | 0.304042000  |
| Cl | -1.748847000 | -1.432279000 | -0.359167000 |
| Cl | -1.823689000 | 1.381547000  | -0.462665000 |

*Sum of electronic and zero-point Energies=* -1344.784119  
*Sum of electronic and thermal Energies=* -1344.774666  
*Sum of electronic and thermal Enthalpies=* -1344.773722  
*Sum of electronic and thermal Free Energies=* -1344.819522

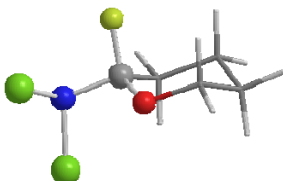

|    |              |              |              |
|----|--------------|--------------|--------------|
| C  | -0.866209000 | 1.988965000  | 1.170003000  |
| C  | -2.364993000 | 2.256951000  | 1.102801000  |
| H  | -0.674725000 | 1.123825000  | 1.812402000  |
| H  | -0.363522000 | 2.843862000  | 1.627839000  |
| C  | -3.048919000 | 1.129454000  | 0.348219000  |
| H  | -2.553744000 | 3.191877000  | 0.574236000  |
| H  | -2.814104000 | 2.327806000  | 2.094227000  |
| N  | -4.497275000 | 1.386866000  | 0.237634000  |
| O  | -2.509545000 | 0.865512000  | -0.875797000 |
| C  | -1.106032000 | 0.598426000  | -0.873236000 |
| C  | -0.326703000 | 1.722652000  | -0.227464000 |
| H  | 0.732257000  | 1.451670000  | -0.195670000 |
| F  | -2.977642000 | -0.000036000 | 1.133567000  |
| H  | -0.843836000 | 0.468896000  | -1.923138000 |
| H  | -0.925796000 | -0.349351000 | -0.353598000 |
| H  | -0.415283000 | 2.624853000  | -0.841855000 |
| Cl | -4.791004000 | 2.783187000  | -0.740669000 |
| Cl | -5.298507000 | 0.024532000  | -0.471893000 |

*Sum of electronic and zero-point Energies=* -1344.783565  
*Sum of electronic and thermal Energies=* -1344.774075  
*Sum of electronic and thermal Enthalpies=* -1344.773131  
*Sum of electronic and thermal Free Energies=* -1344.818975

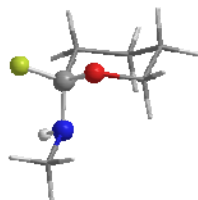

|   |              |              |              |
|---|--------------|--------------|--------------|
| C | -1.165111000 | 1.240866000  | 1.088754000  |
| O | -2.512306000 | 1.246570000  | 0.638436000  |
| H | 0.811209000  | 1.671974000  | 0.382328000  |
| H | -0.888056000 | 0.230143000  | 1.414083000  |
| C | -2.737237000 | 0.449787000  | -0.479148000 |
| H | -1.151418000 | 1.899773000  | 1.958269000  |
| N | -2.606683000 | -0.922809000 | -0.159604000 |
| C | -1.851296000 | 0.843070000  | -1.649191000 |
| C | -0.383798000 | 0.874847000  | -1.243527000 |
| C | -0.216278000 | 1.721358000  | 0.009850000  |
| F | -4.050550000 | 0.762069000  | -0.824125000 |
| H | -2.025999000 | 0.159562000  | -2.484687000 |
| H | -2.181420000 | 1.835675000  | -1.965244000 |
| H | 0.222788000  | 1.267654000  | -2.063759000 |
| H | -0.036414000 | -0.143917000 | -1.045025000 |
| H | -0.432413000 | 2.771178000  | -0.215879000 |
| C | -3.478023000 | -1.430264000 | 0.884847000  |
| H | -2.656601000 | -1.483647000 | -0.998192000 |
| H | -4.543510000 | -1.362617000 | 0.637242000  |
| H | -3.309018000 | -0.866441000 | 1.802259000  |
| H | -3.225565000 | -2.473932000 | 1.077914000  |

*Sum of electronic and zero-point Energies=* -465.164729  
*Sum of electronic and thermal Energies=* -465.155925  
*Sum of electronic and thermal Enthalpies=* -465.154981  
*Sum of electronic and thermal Free Energies=* -465.197993

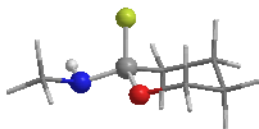

|   |              |              |              |
|---|--------------|--------------|--------------|
| C | -0.654717000 | 2.341449000  | 0.991630000  |
| C | -2.132193000 | 2.663013000  | 1.158153000  |
| H | -0.363116000 | 1.578968000  | 1.720339000  |
| H | -0.052933000 | 3.229992000  | 1.198319000  |
| C | -2.998509000 | 1.494266000  | 0.719926000  |
| H | -2.411294000 | 3.516661000  | 0.535065000  |
| H | -2.369297000 | 2.909796000  | 2.196274000  |
| N | -4.365449000 | 1.813517000  | 0.740613000  |
| O | -2.688085000 | 1.026434000  | -0.537128000 |
| C | -1.323883000 | 0.667866000  | -0.719764000 |
| C | -0.397228000 | 1.826539000  | -0.417302000 |
| H | 0.640039000  | 1.499073000  | -0.533408000 |
| F | -2.714110000 | 0.431601000  | 1.635064000  |
| H | -1.249842000 | 0.355116000  | -1.762085000 |
| H | -1.085531000 | -0.192471000 | -0.084321000 |
| H | -0.571223000 | 2.626238000  | -1.145579000 |
| C | -5.294551000 | 0.749526000  | 0.402948000  |
| H | -4.596877000 | 2.251183000  | 1.620767000  |
| H | -5.223044000 | -0.120937000 | 1.065596000  |
| H | -5.111770000 | 0.421559000  | -0.619341000 |
| H | -6.308887000 | 1.147510000  | 0.452832000  |

*Sum of electronic and zero-point Energies=* -465.166811  
*Sum of electronic and thermal Energies=* -465.157959  
*Sum of electronic and thermal Enthalpies=* -465.157015  
*Sum of electronic and thermal Free Energies=* -465.200083

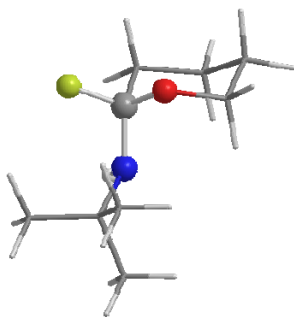

|   |              |              |              |
|---|--------------|--------------|--------------|
| C | -1.295704000 | 1.078682000  | 1.176075000  |
| O | -2.620485000 | 1.058883000  | 0.672119000  |
| C | -2.747143000 | 0.424469000  | -0.564606000 |
| N | -2.493718000 | -0.963650000 | -0.494352000 |
| C | -1.861853000 | 1.089972000  | -1.610436000 |
| C | -0.413660000 | 1.173413000  | -1.146413000 |
| C | -0.354611000 | 1.805535000  | 0.236603000  |
| F | -4.069978000 | 0.704440000  | -0.905531000 |
| C | -3.384596000 | -1.938623000 | 0.159973000  |
| C | -4.608842000 | -2.256498000 | -0.704699000 |
| H | -0.947026000 | 0.051176000  | 1.340157000  |
| H | -1.362977000 | 1.579175000  | 2.143414000  |
| H | -2.209560000 | -1.314777000 | -1.397894000 |
| H | -1.955862000 | 0.561834000  | -2.563245000 |
| H | -2.270457000 | 2.093314000  | -1.753115000 |
| H | 0.175815000  | 1.749496000  | -1.864720000 |
| H | 0.022069000  | 0.169675000  | -1.108197000 |
| H | 0.661662000  | 1.772165000  | 0.640331000  |
| H | -0.649373000 | 2.858825000  | 0.178153000  |
| C | -3.839597000 | -1.453842000 | 1.530676000  |
| C | -2.553822000 | -3.208990000 | 0.327612000  |
| H | -4.301247000 | -2.607385000 | -1.694679000 |
| H | -5.238306000 | -1.377074000 | -0.834934000 |
| H | -5.206115000 | -3.047628000 | -0.243427000 |
| H | -1.684049000 | -3.019578000 | 0.959861000  |
| H | -2.197935000 | -3.575491000 | -0.640451000 |
| H | -3.151798000 | -4.001950000 | 0.782499000  |
| H | -4.453258000 | -0.556603000 | 1.459722000  |
| H | -2.987508000 | -1.233962000 | 2.176111000  |
| H | -4.431865000 | -2.241404000 | 2.002893000  |

Sum of electronic and zero-point Energies= -582.915449  
 Sum of electronic and thermal Energies= -582.902850  
 Sum of electronic and thermal Enthalpies= -582.901906  
 Sum of electronic and thermal Free Energies= -582.953249

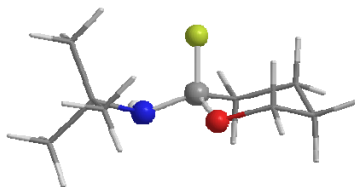

|   |              |             |              |
|---|--------------|-------------|--------------|
| C | -0.410828000 | 2.093688000 | 0.760424000  |
| C | -1.822106000 | 2.629738000 | 0.944100000  |
| C | -2.863084000 | 1.540427000 | 0.718868000  |
| N | -4.159306000 | 2.070674000 | 0.761933000  |
| O | -2.679640000 | 0.871896000 | -0.477061000 |
| C | -1.387684000 | 0.306881000 | -0.658451000 |
| C | -0.303759000 | 1.359597000 | -0.567986000 |
| F | -2.644794000 | 0.575262000 | 1.751293000  |
| C | -5.389585000 | 1.278173000 | 0.928270000  |
| C | -5.592991000 | 0.843656000 | 2.383357000  |

|   |              |              |              |
|---|--------------|--------------|--------------|
| H | -0.174284000 | 1.406878000  | 1.578890000  |
| H | 0.308908000  | 2.914553000  | 0.813095000  |
| H | -2.025918000 | 3.422162000  | 0.218540000  |
| H | -1.956705000 | 3.042228000  | 1.947396000  |
| H | -4.182911000 | 2.876580000  | 1.369930000  |
| H | -1.416872000 | -0.156157000 | -1.645815000 |
| H | -1.222110000 | -0.481001000 | 0.085227000  |
| H | 0.675418000  | 0.884146000  | -0.676591000 |
| H | -0.418564000 | 2.066237000  | -1.397239000 |
| C | -5.398359000 | 0.054750000  | 0.021366000  |
| C | -6.530778000 | 2.208694000  | 0.523353000  |
| H | -5.598610000 | 1.712744000  | 3.048635000  |
| H | -4.799074000 | 0.171660000  | 2.707347000  |
| H | -6.552553000 | 0.332234000  | 2.498232000  |
| H | -6.423683000 | 2.513702000  | -0.519179000 |
| H | -6.539556000 | 3.110741000  | 1.143453000  |
| H | -7.495090000 | 1.710925000  | 0.648671000  |
| H | -4.627613000 | -0.661450000 | 0.305485000  |
| H | -5.233951000 | 0.336523000  | -1.019006000 |
| H | -6.370719000 | -0.437143000 | 0.103562000  |

*Sum of electronic and zero-point Energies=* -582.917629  
*Sum of electronic and thermal Energies=* -582.904916  
*Sum of electronic and thermal Enthalpies=* -582.903972  
*Sum of electronic and thermal Free Energies=* -582.955695

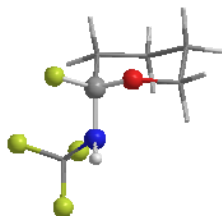

|   |              |              |              |
|---|--------------|--------------|--------------|
| C | -1.090042000 | 1.499931000  | 0.968770000  |
| O | -2.395561000 | 1.255588000  | 0.451703000  |
| H | 0.826706000  | 2.210457000  | 0.341238000  |
| H | -0.674235000 | 0.566944000  | 1.368841000  |
| C | -2.438401000 | 0.407124000  | -0.641618000 |
| H | -1.242218000 | 2.191795000  | 1.797642000  |
| N | -2.168561000 | -0.923722000 | -0.165786000 |
| C | -1.543343000 | 0.868159000  | -1.776338000 |
| C | -0.127395000 | 1.150082000  | -1.293134000 |
| C | -0.170814000 | 2.075455000  | -0.086408000 |
| F | -3.745064000 | 0.486817000  | -1.063703000 |
| H | -1.562721000 | 0.142895000  | -2.590371000 |
| H | -2.006248000 | 1.786145000  | -2.146896000 |
| H | 0.455344000  | 1.592940000  | -2.104217000 |
| H | 0.365661000  | 0.211622000  | -1.023125000 |
| H | -0.536394000 | 3.064220000  | -0.382876000 |
| C | -2.052212000 | -2.025542000 | -1.019767000 |
| H | -2.749057000 | -1.139637000 | 0.633825000  |
| F | -0.868283000 | -2.051116000 | -1.647607000 |
| F | -2.980192000 | -2.098153000 | -1.988568000 |
| F | -2.152870000 | -3.140004000 | -0.290306000 |

*Sum of electronic and zero-point Energies=* -762.795819  
*Sum of electronic and thermal Energies=* -762.785364  
*Sum of electronic and thermal Enthalpies=* -762.784419  
*Sum of electronic and thermal Free Energies=* -762.832395

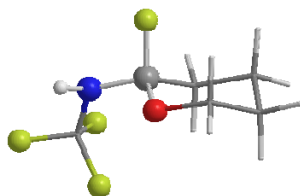

|   |              |              |              |
|---|--------------|--------------|--------------|
| C | -0.735847000 | 2.098098000  | 1.140165000  |
| C | -2.215702000 | 2.429628000  | 1.002931000  |
| H | -0.607529000 | 1.276134000  | 1.850938000  |
| H | -0.206235000 | 2.960641000  | 1.550924000  |
| C | -2.942890000 | 1.287434000  | 0.318759000  |
| H | -2.335850000 | 3.329383000  | 0.396176000  |
| H | -2.682691000 | 2.610718000  | 1.971522000  |
| N | -4.336252000 | 1.508573000  | 0.086142000  |
| O | -2.365317000 | 0.908903000  | -0.878314000 |
| C | -0.980044000 | 0.572590000  | -0.802580000 |
| C | -0.165106000 | 1.702806000  | -0.213487000 |
| H | 0.877763000  | 1.386051000  | -0.123929000 |
| F | -2.890708000 | 0.186887000  | 1.169954000  |
| H | -0.686947000 | 0.351850000  | -1.829262000 |
| H | -0.864211000 | -0.340138000 | -0.207436000 |
| H | -0.189353000 | 2.559995000  | -0.894795000 |
| C | -4.845959000 | 2.743219000  | -0.319194000 |
| H | -4.730130000 | 0.756987000  | -0.464511000 |
| F | -4.189065000 | 3.332003000  | -1.339773000 |
| F | -4.848176000 | 3.638432000  | 0.674742000  |
| F | -6.106579000 | 2.565949000  | -0.721367000 |

*Sum of electronic and zero-point Energies=* -762.796461  
*Sum of electronic and thermal Energies=* -762.785900  
*Sum of electronic and thermal Enthalpies=* -762.784956  
*Sum of electronic and thermal Free Energies=* -762.833353

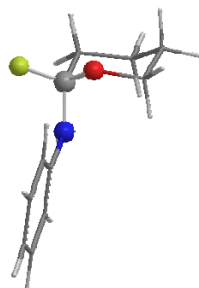

|   |              |              |              |
|---|--------------|--------------|--------------|
| C | -1.992294000 | 1.794595000  | 0.721442000  |
| O | -2.996381000 | 1.230017000  | -0.110301000 |
| H | 0.000009000  | 2.575260000  | 0.590389000  |
| H | -1.728477000 | 1.084299000  | 1.514854000  |
| C | -2.592929000 | 0.077004000  | -0.776854000 |
| H | -2.459316000 | 2.665362000  | 1.182940000  |
| N | -2.352699000 | -1.001951000 | 0.108736000  |
| C | -1.374560000 | 0.336970000  | -1.648828000 |
| C | -0.244052000 | 0.969173000  | -0.846413000 |
| C | -0.765787000 | 2.177355000  | -0.081626000 |
| F | -3.664232000 | -0.196212000 | -1.607114000 |
| H | -1.063925000 | -0.592530000 | -2.133997000 |
| H | -1.709668000 | 1.017263000  | -2.435067000 |
| H | 0.572677000  | 1.253079000  | -1.514960000 |
| H | 0.165190000  | 0.239345000  | -0.139709000 |
| H | -1.032408000 | 2.975315000  | -0.782730000 |
| C | -3.283492000 | -1.553121000 | 0.991601000  |
| H | -1.672944000 | -1.661520000 | -0.230516000 |
| C | -4.509212000 | -0.956924000 | 1.288907000  |

|   |              |              |             |
|---|--------------|--------------|-------------|
| C | -5.364692000 | -1.556371000 | 2.200693000 |
| C | -5.031764000 | -2.746870000 | 2.827865000 |
| C | -3.814928000 | -3.342539000 | 2.528329000 |
| C | -2.950119000 | -2.753473000 | 1.624096000 |
| H | -4.791831000 | -0.032923000 | 0.805603000 |
| H | -6.314368000 | -1.079162000 | 2.416523000 |
| H | -5.710410000 | -3.206043000 | 3.536475000 |
| H | -3.532413000 | -4.275903000 | 3.002564000 |
| H | -1.997575000 | -3.225895000 | 1.402199000 |

Sum of electronic and zero-point Energies= -656.694104  
Sum of electronic and thermal Energies= -656.682280  
Sum of electronic and thermal Enthalpies= -656.681336  
Sum of electronic and thermal Free Energies= -656.732558

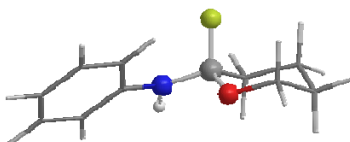

|   |              |              |              |
|---|--------------|--------------|--------------|
| C | -0.375372000 | 2.245666000  | 0.061102000  |
| C | -1.594118000 | 3.021483000  | 0.536877000  |
| H | 0.172699000  | 1.866507000  | 0.928988000  |
| H | 0.302016000  | 2.912633000  | -0.477626000 |
| C | -2.617583000 | 2.087810000  | 1.165151000  |
| H | -2.076107000 | 3.515824000  | -0.313078000 |
| H | -1.323153000 | 3.784517000  | 1.269535000  |
| N | -3.778715000 | 2.789002000  | 1.531872000  |
| O | -2.941122000 | 1.021801000  | 0.344251000  |
| C | -1.833600000 | 0.238917000  | -0.088812000 |
| C | -0.810424000 | 1.082806000  | -0.819027000 |
| H | 0.044322000  | 0.458735000  | -1.094949000 |
| F | -2.022711000 | 1.550095000  | 2.320338000  |
| H | -2.262902000 | -0.525942000 | -0.736975000 |
| H | -1.377850000 | -0.258916000 | 0.774635000  |
| H | -1.251908000 | 1.460783000  | -1.747697000 |
| C | -4.964590000 | 2.231785000  | 1.998103000  |
| H | -3.864053000 | 3.700554000  | 1.119187000  |
| C | -5.035154000 | 0.954363000  | 2.555181000  |
| C | -6.242819000 | 0.475670000  | 3.035605000  |
| C | -7.395503000 | 1.245685000  | 2.983312000  |
| C | -7.324704000 | 2.517771000  | 2.435365000  |
| C | -6.126080000 | 3.005182000  | 1.945346000  |
| H | -4.146591000 | 0.342245000  | 2.614378000  |
| H | -6.277623000 | -0.520356000 | 3.463389000  |
| H | -8.333625000 | 0.861161000  | 3.364829000  |
| H | -8.211573000 | 3.139568000  | 2.382676000  |
| H | -6.084456000 | 4.001249000  | 1.514144000  |

Sum of electronic and zero-point Energies= -656.695422  
Sum of electronic and thermal Energies= -656.683333  
Sum of electronic and thermal Enthalpies= -656.682388  
Sum of electronic and thermal Free Energies= -656.734443

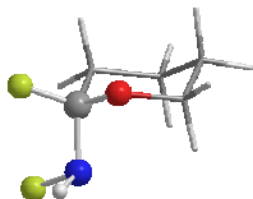

|   |             |              |              |
|---|-------------|--------------|--------------|
| C | 1.546695000 | -0.937334000 | -0.697337000 |
| O | 0.388228000 | -1.327118000 | 0.044402000  |
| H | 3.105341000 | 0.520163000  | -0.692337000 |
| H | 1.255314000 | -0.694862000 | -1.725134000 |

|   |              |              |              |
|---|--------------|--------------|--------------|
| C | -0.524579000 | -0.320330000 | 0.296548000  |
| H | 2.174051000  | -1.828999000 | -0.716899000 |
| N | -1.188367000 | -0.082599000 | -0.964602000 |
| C | 0.072886000  | 0.932735000  | 0.897139000  |
| C | 1.288484000  | 1.397154000  | 0.108775000  |
| C | 2.257301000  | 0.237197000  | -0.062224000 |
| F | -1.404358000 | -0.864531000 | 1.198925000  |
| H | -0.699988000 | 1.699931000  | 0.952555000  |
| H | 0.358050000  | 0.669152000  | 1.918855000  |
| H | 1.766028000  | 2.233631000  | 0.624295000  |
| H | 0.972781000  | 1.763149000  | -0.873271000 |
| H | 2.659191000  | -0.062931000 | 0.911436000  |
| H | -1.705667000 | -0.932677000 | -1.187528000 |
| F | -2.208651000 | 0.861425000  | -0.762524000 |

*Sum of electronic and zero-point Energies=* -525.049832  
*Sum of electronic and thermal Energies=* -525.041786  
*Sum of electronic and thermal Enthalpies=* -525.040842  
*Sum of electronic and thermal Free Energies=* -525.082482

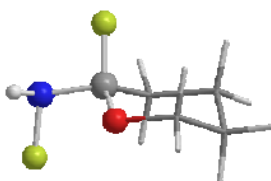

|   |              |              |              |
|---|--------------|--------------|--------------|
| C | -0.989148000 | 1.956564000  | 0.868909000  |
| C | -2.492329000 | 2.191859000  | 0.839595000  |
| H | -0.762151000 | 1.102786000  | 1.515905000  |
| H | -0.486681000 | 2.824638000  | 1.301628000  |
| C | -3.201519000 | 1.075075000  | 0.107625000  |
| H | -2.723641000 | 3.120162000  | 0.312130000  |
| H | -2.918504000 | 2.261423000  | 1.841382000  |
| N | -4.623698000 | 1.325392000  | -0.025002000 |
| O | -2.670256000 | 0.775792000  | -1.122498000 |
| C | -1.263399000 | 0.529816000  | -1.140890000 |
| C | -0.485230000 | 1.678375000  | -0.539044000 |
| H | 0.579064000  | 1.426655000  | -0.535397000 |
| F | -3.179791000 | -0.070990000 | 0.887993000  |
| H | -1.017067000 | 0.376552000  | -2.191812000 |
| H | -1.057142000 | -0.401734000 | -0.600614000 |
| H | -0.609222000 | 2.568015000  | -1.165582000 |
| F | -4.766620000 | 2.458764000  | -0.842432000 |
| H | -4.987466000 | 0.580957000  | -0.621895000 |

*Sum of electronic and zero-point Energies=* -525.049228  
*Sum of electronic and thermal Energies=* -525.041116  
*Sum of electronic and thermal Enthalpies=* -525.040172  
*Sum of electronic and thermal Free Energies=* -525.082042

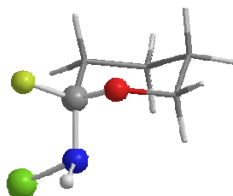

|   |              |              |              |
|---|--------------|--------------|--------------|
| C | 1.883271000  | -0.548961000 | -0.971660000 |
| O | 0.919232000  | -1.291815000 | -0.224287000 |
| H | 3.160191000  | 1.153469000  | -0.796101000 |
| H | 1.418487000  | -0.167171000 | -1.887562000 |
| C | -0.118441000 | -0.547320000 | 0.311139000  |
| H | 2.642488000  | -1.281137000 | -1.248638000 |
| N | -0.958109000 | -0.188030000 | -0.807728000 |
| C | 0.345847000  | 0.638308000  | 1.129670000  |

|    |              |              |              |
|----|--------------|--------------|--------------|
| C  | 1.350382000  | 1.480459000  | 0.357351000  |
| C  | 2.467292000  | 0.589728000  | -0.164881000 |
| F  | -0.770138000 | -1.425971000 | 1.142412000  |
| H  | -0.520323000 | 1.220666000  | 1.445483000  |
| H  | 0.808164000  | 0.218391000  | 2.026565000  |
| H  | 1.747417000  | 2.267469000  | 1.002825000  |
| H  | 0.848597000  | 1.975163000  | -0.480397000 |
| H  | 3.044606000  | 0.183314000  | 0.672454000  |
| H  | -1.237980000 | -1.051635000 | -1.264752000 |
| Cl | -2.423388000 | 0.605450000  | -0.368994000 |

Sum of electronic and zero-point Energies= -885.356949  
Sum of electronic and thermal Energies= -885.348649  
Sum of electronic and thermal Enthalpies= -885.347704  
Sum of electronic and thermal Free Energies= -885.390432

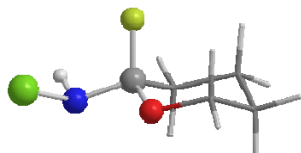

|    |              |              |              |
|----|--------------|--------------|--------------|
| C  | -0.897091000 | 1.856026000  | 0.948429000  |
| C  | -2.393241000 | 2.137342000  | 0.989492000  |
| H  | -0.660058000 | 1.041899000  | 1.640094000  |
| H  | -0.347428000 | 2.736695000  | 1.288984000  |
| C  | -3.162065000 | 0.977917000  | 0.369447000  |
| H  | -2.631725000 | 3.031617000  | 0.409115000  |
| H  | -2.739029000 | 2.291925000  | 2.014488000  |
| N  | -4.540119000 | 1.335767000  | 0.273810000  |
| O  | -2.726813000 | 0.636470000  | -0.878787000 |
| C  | -1.339438000 | 0.320815000  | -0.955946000 |
| C  | -0.482852000 | 1.467677000  | -0.463640000 |
| H  | 0.569427000  | 1.171560000  | -0.495667000 |
| F  | -2.987317000 | -0.128339000 | 1.217717000  |
| H  | -1.159424000 | 0.102884000  | -2.008648000 |
| H  | -1.142985000 | -0.588454000 | -0.377222000 |
| H  | -0.602818000 | 2.322544000  | -1.137725000 |
| Cl | -5.543906000 | 0.069299000  | -0.325433000 |
| H  | -4.887318000 | 1.537257000  | 1.204993000  |

Sum of electronic and zero-point Energies= -885.356822  
Sum of electronic and thermal Energies= -885.348462  
Sum of electronic and thermal Enthalpies= -885.347518  
Sum of electronic and thermal Free Energies= -885.390326

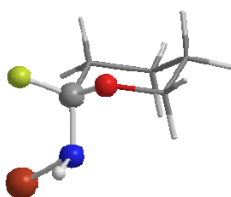

|   |              |              |              |
|---|--------------|--------------|--------------|
| C | 2.046978000  | -0.640189000 | -1.022854000 |
| O | 1.083328000  | -1.380827000 | -0.273190000 |
| H | 3.327062000  | 1.060403000  | -0.850782000 |
| H | 1.581296000  | -0.258046000 | -1.938130000 |
| C | 0.045785000  | -0.633971000 | 0.264027000  |
| H | 2.804003000  | -1.374231000 | -1.300948000 |
| N | -0.789848000 | -0.271226000 | -0.856013000 |
| C | 0.518719000  | 0.547692000  | 1.083879000  |
| C | 1.521742000  | 1.389309000  | 0.309063000  |
| C | 2.635445000  | 0.497310000  | -0.217572000 |
| F | -0.603743000 | -1.514083000 | 1.095510000  |
| H | -0.342845000 | 1.133012000  | 1.407646000  |
| H | 0.984605000  | 0.123566000  | 1.976963000  |



|    |              |              |              |
|----|--------------|--------------|--------------|
| H  | 1.922132000  | 2.175253000  | 0.953808000  |
| H  | 1.017829000  | 1.885413000  | -0.526606000 |
| H  | 3.214968000  | 0.089809000  | 0.617736000  |
| H  | -1.064925000 | -1.136045000 | -1.314373000 |
| Br | -2.404231000 | 0.571752000  | -0.400964000 |

*Sum of electronic and zero-point Energies=* -2999.159156  
*Sum of electronic and thermal Energies=* -2999.150664  
*Sum of electronic and thermal Enthalpies=* -2999.149720  
*Sum of electronic and thermal Free Energies=* -2999.193719

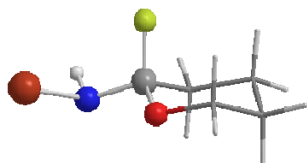

|    |              |              |              |
|----|--------------|--------------|--------------|
| C  | -0.887707000 | 1.860713000  | 0.942487000  |
| C  | -2.382845000 | 2.146565000  | 0.995614000  |
| H  | -0.646633000 | 1.049308000  | 1.635867000  |
| H  | -0.332980000 | 2.741769000  | 1.274072000  |
| C  | -3.162172000 | 0.985399000  | 0.388054000  |
| H  | -2.624177000 | 3.038485000  | 0.413071000  |
| H  | -2.719708000 | 2.307040000  | 2.022539000  |
| N  | -4.538002000 | 1.346054000  | 0.302787000  |
| O  | -2.736505000 | 0.638612000  | -0.862975000 |
| C  | -1.350975000 | 0.318382000  | -0.950799000 |
| C  | -0.486914000 | 1.465116000  | -0.471264000 |
| H  | 0.564197000  | 1.165871000  | -0.511284000 |
| F  | -2.976522000 | -0.117018000 | 1.239898000  |
| H  | -1.180627000 | 0.094820000  | -2.003962000 |
| H  | -1.152038000 | -0.588608000 | -0.369371000 |
| H  | -0.610641000 | 2.317298000  | -1.148042000 |
| Br | -5.648751000 | -0.020787000 | -0.350915000 |
| H  | -4.880703000 | 1.529681000  | 1.239525000  |

*Sum of electronic and zero-point Energies=* -2999.159875  
*Sum of electronic and thermal Energies=* -2999.151321  
*Sum of electronic and thermal Enthalpies=* -2999.150377  
*Sum of electronic and thermal Free Energies=* -2999.194471

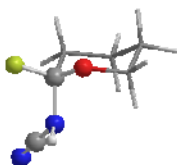

|   |              |              |              |
|---|--------------|--------------|--------------|
| C | -1.794587000 | 0.283999000  | -1.022740000 |
| O | -0.956332000 | 1.221331000  | -0.346950000 |
| H | -2.851301000 | -1.539583000 | -0.674504000 |
| H | -1.256785000 | -0.129458000 | -1.885051000 |
| C | 0.156018000  | 0.673906000  | 0.253532000  |
| H | -2.632142000 | 0.875533000  | -1.392493000 |
| N | 1.090591000  | 0.301209000  | -0.792173000 |
| C | -0.153106000 | -0.473367000 | 1.191624000  |
| C | -1.039749000 | -1.512162000 | 0.519325000  |
| C | -2.247907000 | -0.828636000 | -0.103350000 |
| F | 0.694873000  | 1.706314000  | 0.974580000  |
| H | 0.779939000  | -0.905566000 | 1.558610000  |
| H | -0.667665000 | -0.023375000 | 2.043956000  |
| H | -1.347486000 | -2.261678000 | 1.251579000  |
| H | -0.472090000 | -2.041164000 | -0.253214000 |
| H | -2.888981000 | -0.411227000 | 0.680138000  |
| H | 1.230119000  | 1.035281000  | -1.474393000 |
| C | 2.158487000  | -0.449167000 | -0.525849000 |
| N | 3.056303000  | -1.143163000 | -0.311469000 |

Sum of electronic and zero-point Energies= -518.083606  
 Sum of electronic and thermal Energies= -518.074662  
 Sum of electronic and thermal Enthalpies= -518.073718  
 Sum of electronic and thermal Free Energies= -518.117802

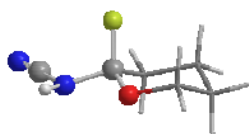

|   |              |              |              |
|---|--------------|--------------|--------------|
| C | -1.011889000 | 2.047773000  | 0.787042000  |
| C | -2.439749000 | 2.426902000  | 0.420739000  |
| H | -1.024908000 | 1.318669000  | 1.602806000  |
| H | -0.480889000 | 2.928453000  | 1.154490000  |
| C | -3.135482000 | 1.252591000  | -0.236444000 |
| H | -2.446067000 | 3.250651000  | -0.297803000 |
| H | -3.014148000 | 2.738373000  | 1.295058000  |
| N | -4.418608000 | 1.589484000  | -0.772762000 |
| O | -2.452064000 | 0.709328000  | -1.293146000 |
| C | -1.116363000 | 0.304750000  | -0.984299000 |
| C | -0.306719000 | 1.453842000  | -0.424197000 |
| H | 0.690657000  | 1.091905000  | -0.159871000 |
| F | -3.293532000 | 0.259606000  | 0.735254000  |
| H | -0.710348000 | -0.059004000 | -1.927959000 |
| H | -1.150607000 | -0.530764000 | -0.276907000 |
| H | -0.181756000 | 2.218678000  | -1.198066000 |
| C | -5.295261000 | 2.284556000  | -0.052717000 |
| H | -4.795107000 | 0.894073000  | -1.402381000 |
| N | -6.044958000 | 2.925336000  | 0.547762000  |

Sum of electronic and zero-point Energies= -518.085877  
 Sum of electronic and thermal Energies= -518.076825  
 Sum of electronic and thermal Enthalpies= -518.075881  
 Sum of electronic and thermal Free Energies= -518.120166

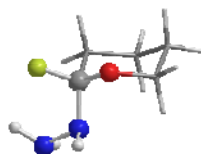

|   |              |              |              |
|---|--------------|--------------|--------------|
| C | 1.553332000  | -0.905188000 | -0.738425000 |
| O | 0.429767000  | -1.321080000 | 0.032239000  |
| H | 3.102449000  | 0.569786000  | -0.738875000 |
| H | 1.226433000  | -0.634920000 | -1.749477000 |
| C | -0.501842000 | -0.326442000 | 0.280369000  |
| H | 2.190845000  | -1.787659000 | -0.806246000 |
| N | -1.201542000 | -0.049192000 | -0.930463000 |
| C | 0.103435000  | 0.902013000  | 0.932411000  |
| C | 1.302042000  | 1.404646000  | 0.140194000  |
| C | 2.275249000  | 0.259010000  | -0.094050000 |
| F | -1.366949000 | -0.902452000 | 1.208533000  |
| H | -0.663522000 | 1.671623000  | 1.041142000  |
| H | 0.408401000  | 0.600840000  | 1.937543000  |
| H | 1.785960000  | 2.226006000  | 0.674630000  |
| H | 0.965679000  | 1.800733000  | -0.823664000 |
| H | 2.706817000  | -0.065575000 | 0.858852000  |
| H | -1.441691000 | -0.928306000 | -1.372907000 |
| N | -2.352137000 | 0.750501000  | -0.840368000 |
| H | -2.094465000 | 1.724166000  | -0.920332000 |
| H | -2.840039000 | 0.600626000  | 0.037446000  |

Sum of electronic and zero-point Energies= -481.185607  
 Sum of electronic and thermal Energies= -481.177185  
 Sum of electronic and thermal Enthalpies= -481.176241  
 Sum of electronic and thermal Free Energies= -481.218340

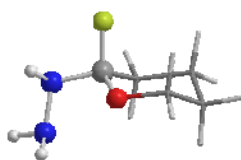

|   |              |              |              |
|---|--------------|--------------|--------------|
| C | -0.889403000 | 1.912160000  | 0.851747000  |
| C | -2.379035000 | 2.215611000  | 0.913317000  |
| H | -0.666674000 | 1.030701000  | 1.462617000  |
| H | -0.322200000 | 2.743660000  | 1.277583000  |
| C | -3.193220000 | 1.161405000  | 0.195115000  |
| H | -2.604712000 | 3.167597000  | 0.428233000  |
| H | -2.740555000 | 2.269888000  | 1.941532000  |
| N | -4.582787000 | 1.486348000  | 0.119550000  |
| O | -2.724749000 | 0.876006000  | -1.081728000 |
| C | -1.340346000 | 0.555391000  | -1.172109000 |
| C | -0.473112000 | 1.648240000  | -0.587002000 |
| H | 0.576826000  | 1.346656000  | -0.646722000 |
| F | -3.146482000 | -0.017783000 | 0.928752000  |
| H | -1.146852000 | 0.409750000  | -2.236036000 |
| H | -1.155912000 | -0.396346000 | -0.658818000 |
| H | -0.587452000 | 2.559216000  | -1.184485000 |
| N | -4.809927000 | 2.638032000  | -0.655941000 |
| H | -5.063046000 | 0.665622000  | -0.241954000 |
| H | -5.684936000 | 3.051537000  | -0.368610000 |
| H | -4.837624000 | 2.430710000  | -1.648542000 |

*Sum of electronic and zero-point Energies=* -481.185660  
*Sum of electronic and thermal Energies=* -481.177164  
*Sum of electronic and thermal Enthalpies=* -481.176219  
*Sum of electronic and thermal Free Energies=* -481.218537

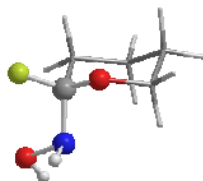

|   |              |              |              |
|---|--------------|--------------|--------------|
| C | 1.541761000  | -0.864643000 | -0.784172000 |
| O | 0.418301000  | -1.328996000 | -0.041196000 |
| H | 3.083083000  | 0.614743000  | -0.705456000 |
| H | 1.215590000  | -0.545225000 | -1.780858000 |
| C | -0.514563000 | -0.355845000 | 0.283272000  |
| H | 2.184930000  | -1.738555000 | -0.895678000 |
| N | -1.211403000 | -0.028082000 | -0.930109000 |
| C | 0.080782000  | 0.849933000  | 0.978157000  |
| C | 1.275462000  | 1.396240000  | 0.209810000  |
| C | 2.255386000  | 0.269048000  | -0.079241000 |
| F | -1.363410000 | -0.985674000 | 1.166590000  |
| H | -0.701971000 | 1.596715000  | 1.115316000  |
| H | 0.391650000  | 0.506841000  | 1.968088000  |
| H | 1.754191000  | 2.194253000  | 0.782741000  |
| H | 0.939215000  | 1.838332000  | -0.734229000 |
| H | 2.686007000  | -0.100392000 | 0.857609000  |
| H | -1.637031000 | -0.888830000 | -1.265623000 |
| O | -2.279586000 | 0.857498000  | -0.672628000 |
| H | -2.107836000 | 1.593350000  | -1.266814000 |

*Sum of electronic and zero-point Energies=* -501.039719  
*Sum of electronic and thermal Energies=* -501.031372  
*Sum of electronic and thermal Enthalpies=* -501.030428  
*Sum of electronic and thermal Free Energies=* -501.072444

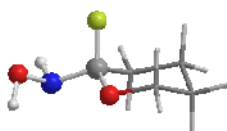

|   |              |              |              |
|---|--------------|--------------|--------------|
| C | -0.990253000 | 2.073533000  | 0.790640000  |
| C | -2.497133000 | 2.286686000  | 0.832017000  |
| H | -0.710107000 | 1.312930000  | 1.525876000  |
| H | -0.476449000 | 2.995832000  | 1.072189000  |
| C | -3.219199000 | 1.062169000  | 0.293279000  |
| H | -2.781768000 | 3.134888000  | 0.204522000  |
| H | -2.840015000 | 2.486091000  | 1.850428000  |
| N | -4.612659000 | 1.331813000  | 0.177619000  |
| O | -2.776748000 | 0.666282000  | -0.945004000 |
| C | -1.378884000 | 0.408198000  | -1.014524000 |
| C | -0.570189000 | 1.619536000  | -0.600382000 |
| H | 0.494396000  | 1.369899000  | -0.626555000 |
| F | -2.981414000 | 0.013051000  | 1.195435000  |
| H | -1.191702000 | 0.134001000  | -2.053230000 |
| H | -1.137240000 | -0.453931000 | -0.382779000 |
| H | -0.734643000 | 2.426396000  | -1.322850000 |
| O | -5.329787000 | 0.170709000  | -0.171346000 |
| H | -4.969320000 | 1.595163000  | 1.089453000  |
| H | -5.519087000 | 0.303252000  | -1.104486000 |

*Sum of electronic and zero-point Energies=* -501.040566  
*Sum of electronic and thermal Energies=* -501.032097  
*Sum of electronic and thermal Enthalpies=* -501.031153  
*Sum of electronic and thermal Free Energies=* -501.073361

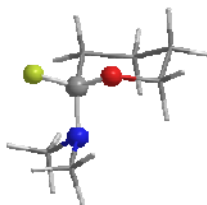

|   |              |              |              |
|---|--------------|--------------|--------------|
| C | -1.138986000 | 1.228658000  | 1.108656000  |
| O | -2.490751000 | 1.287921000  | 0.675005000  |
| H | 0.844787000  | 1.582904000  | 0.380588000  |
| H | -0.894856000 | 0.203497000  | 1.413680000  |
| C | -2.755342000 | 0.507451000  | -0.448775000 |
| H | -1.092240000 | 1.871788000  | 1.988890000  |
| N | -2.651829000 | -0.874924000 | -0.128167000 |
| C | -1.893059000 | 0.954165000  | -1.617662000 |
| C | -0.416172000 | 0.905357000  | -1.252689000 |
| C | -0.184698000 | 1.695343000  | 0.027882000  |
| F | -4.073148000 | 0.840997000  | -0.759741000 |
| H | -2.119790000 | 0.374659000  | -2.512506000 |
| H | -2.195832000 | 1.984683000  | -1.819335000 |
| H | 0.186324000  | 1.307737000  | -2.071280000 |
| H | -0.104560000 | -0.134148000 | -1.105117000 |
| H | -0.350911000 | 2.761313000  | -0.161094000 |
| C | -3.494663000 | -1.283773000 | 0.982263000  |
| C | -2.742121000 | -1.803579000 | -1.234874000 |
| H | -4.549794000 | -1.385941000 | 0.693167000  |
| H | -3.431343000 | -0.552543000 | 1.785484000  |
| H | -3.144433000 | -2.248094000 | 1.357002000  |
| H | -1.941114000 | -1.640538000 | -1.955752000 |
| H | -3.707226000 | -1.756685000 | -1.761081000 |
| H | -2.623743000 | -2.815748000 | -0.843343000 |

*Sum of electronic and zero-point Energies=* -504.402782  
*Sum of electronic and thermal Energies=* -504.392735  
*Sum of electronic and thermal Enthalpies=* -504.391791  
*Sum of electronic and thermal Free Energies=* -504.437431

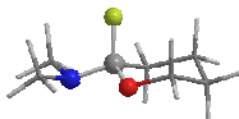

|   |              |              |              |
|---|--------------|--------------|--------------|
| C | -0.642699000 | 2.451994000  | 0.897091000  |
| C | -2.117595000 | 2.824698000  | 0.826289000  |
| H | -0.471095000 | 1.828382000  | 1.779993000  |
| H | -0.042329000 | 3.356419000  | 1.024208000  |
| C | -2.977742000 | 1.617886000  | 0.479361000  |
| H | -2.287936000 | 3.574906000  | 0.048664000  |
| H | -2.441763000 | 3.242729000  | 1.779345000  |
| N | -4.334958000 | 1.921466000  | 0.235746000  |
| O | -2.508333000 | 0.932252000  | -0.621066000 |
| C | -1.152391000 | 0.513204000  | -0.549647000 |
| C | -0.223957000 | 1.689890000  | -0.349495000 |
| H | 0.806606000  | 1.332759000  | -0.265933000 |
| F | -2.862485000 | 0.730786000  | 1.597934000  |
| H | -0.963914000 | 0.003735000  | -1.495625000 |
| H | -1.035798000 | -0.213674000 | 0.262116000  |
| H | -0.275045000 | 2.343211000  | -1.227331000 |
| C | -5.157738000 | 0.775592000  | -0.110889000 |
| C | -4.979013000 | 2.762595000  | 1.221410000  |
| H | -5.372189000 | 0.133158000  | 0.754943000  |
| H | -4.664473000 | 0.180224000  | -0.874814000 |
| H | -6.105544000 | 1.138588000  | -0.513470000 |
| H | -4.476758000 | 3.725393000  | 1.308993000  |
| H | -5.033166000 | 2.298303000  | 2.217601000  |
| H | -5.998986000 | 2.958905000  | 0.886574000  |

*Sum of electronic and zero-point Energies=* -504.405096  
*Sum of electronic and thermal Energies=* -504.394907  
*Sum of electronic and thermal Enthalpies=* -504.393962  
*Sum of electronic and thermal Free Energies=* -504.439992

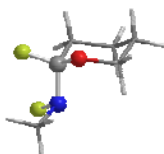

|   |              |              |              |
|---|--------------|--------------|--------------|
| C | -0.795048000 | 1.576041000  | 1.113105000  |
| O | -2.160815000 | 1.521215000  | 0.700002000  |
| H | 1.147067000  | 2.043369000  | 0.358114000  |
| H | -0.476096000 | 0.583466000  | 1.450894000  |
| C | -2.404091000 | 0.770498000  | -0.436659000 |
| H | -0.792214000 | 2.250712000  | 1.970023000  |
| N | -2.228058000 | -0.620146000 | -0.066779000 |
| C | -1.543696000 | 1.175090000  | -1.616020000 |
| C | -0.070999000 | 1.212911000  | -1.236146000 |
| C | 0.111460000  | 2.070201000  | 0.007027000  |
| F | -3.717078000 | 1.031133000  | -0.746867000 |
| H | -1.736204000 | 0.504467000  | -2.452192000 |
| H | -1.888460000 | 2.173471000  | -1.898194000 |
| H | 0.516245000  | 1.605182000  | -2.069882000 |
| H | 0.284741000  | 0.196280000  | -1.042386000 |
| H | -0.129677000 | 3.114178000  | -0.220086000 |
| C | -3.215029000 | -1.123569000 | 0.863280000  |
| F | -2.396120000 | -1.386118000 | -1.243880000 |
| H | -4.227262000 | -1.095190000 | 0.451104000  |
| H | -3.168790000 | -0.496671000 | 1.753333000  |
| H | -2.944976000 | -2.144820000 | 1.128807000  |

*Sum of electronic and zero-point Energies=* -564.296708  
*Sum of electronic and thermal Energies=* -564.287277  
*Sum of electronic and thermal Enthalpies=* -564.286333  
*Sum of electronic and thermal Free Energies=* -564.330919

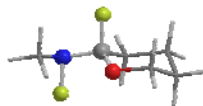

|   |              |              |              |
|---|--------------|--------------|--------------|
| C | 2.081153000  | 0.898667000  | 0.421305000  |
| C | 0.614517000  | 1.290153000  | 0.310833000  |
| H | 2.281927000  | 0.492597000  | 1.418164000  |
| H | 2.710132000  | 1.784570000  | 0.307007000  |
| C | -0.271244000 | 0.061987000  | 0.324925000  |
| H | 0.431087000  | 1.816216000  | -0.627552000 |
| H | 0.299334000  | 1.941032000  | 1.127554000  |
| N | -1.672956000 | 0.410654000  | 0.148747000  |
| O | 0.100553000  | -0.904857000 | -0.575878000 |
| C | 1.464545000  | -1.317382000 | -0.504771000 |
| C | 2.413405000  | -0.146580000 | -0.632809000 |
| H | 3.441198000  | -0.504946000 | -0.525431000 |
| F | -0.239264000 | -0.487147000 | 1.599587000  |
| H | 1.587175000  | -2.032165000 | -1.319136000 |
| H | 1.629123000  | -1.844926000 | 0.442226000  |
| H | 2.320480000  | 0.287325000  | -1.634071000 |
| F | -1.745508000 | 1.051432000  | -1.110365000 |
| C | -2.561727000 | -0.727293000 | 0.050726000  |
| H | -2.477128000 | -1.280245000 | 0.986123000  |
| H | -2.319300000 | -1.382356000 | -0.789764000 |
| H | -3.578707000 | -0.348690000 | -0.043568000 |

*Sum of electronic and zero-point Energies=* -564.296233  
*Sum of electronic and thermal Energies=* -564.286761  
*Sum of electronic and thermal Enthalpies=* -564.285817  
*Sum of electronic and thermal Free Energies=* -564.330507

**Table S9.** Cartesian coordinates and energies of the 2-amino-tetrahydro-2H-pyran conformers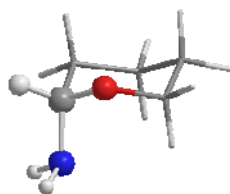

|   |              |              |              |
|---|--------------|--------------|--------------|
| C | -0.778038000 | -1.281612000 | 0.229778000  |
| O | 0.317620000  | -1.149010000 | -0.661512000 |
| H | -2.550720000 | -0.236245000 | 0.837444000  |
| H | -0.412049000 | -1.371368000 | 1.259560000  |
| C | 1.081162000  | 0.019398000  | -0.466684000 |
| H | -1.263886000 | -2.219408000 | -0.046846000 |
| N | 1.743175000  | -0.042517000 | 0.821528000  |
| C | 0.218581000  | 1.273236000  | -0.560494000 |
| C | -0.985806000 | 1.193171000  | 0.368083000  |
| C | -1.733729000 | -0.109806000 | 0.120388000  |
| H | 1.786243000  | 0.002453000  | -1.309170000 |
| H | 0.828420000  | 2.157571000  | -0.348221000 |
| H | -0.120827000 | 1.362199000  | -1.597232000 |
| H | -1.640750000 | 2.054990000  | 0.212136000  |
| H | -0.651378000 | 1.226920000  | 1.409529000  |
| H | -2.177726000 | -0.099875000 | -0.881669000 |
| H | 2.434138000  | -0.782264000 | 0.826466000  |
| H | 2.212323000  | 0.828401000  | 1.032974000  |

*Sum of electronic and zero-point Energies=* -326.704059  
*Sum of electronic and thermal Energies=* -326.697349  
*Sum of electronic and thermal Enthalpies=* -326.696405  
*Sum of electronic and thermal Free Energies=* -326.734232

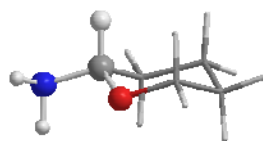

|   |              |              |              |
|---|--------------|--------------|--------------|
| C | 1.226296000  | 1.190964000  | 0.207128000  |
| C | -0.254322000 | 1.269702000  | -0.140958000 |
| H | 1.343109000  | 1.246275000  | 1.296629000  |
| H | 1.762921000  | 2.048960000  | -0.206651000 |
| C | -0.989666000 | 0.023748000  | 0.319390000  |
| H | -0.379394000 | 1.353587000  | -1.227638000 |
| H | -0.723227000 | 2.146568000  | 0.311546000  |
| N | -2.362784000 | 0.070100000  | -0.051308000 |
| O | -0.371064000 | -1.144651000 | -0.219743000 |
| C | 0.974573000  | -1.282785000 | 0.180508000  |
| C | 1.821443000  | -0.117149000 | -0.293765000 |
| H | 2.850787000  | -0.240354000 | 0.056881000  |
| H | -0.932751000 | -0.046225000 | 1.418513000  |
| H | 1.324712000  | -2.229202000 | -0.237151000 |
| H | 1.030883000  | -1.360822000 | 1.279407000  |
| H | 1.846717000  | -0.121789000 | -1.388872000 |
| H | -2.449760000 | 0.139127000  | -1.058644000 |
| H | -2.835942000 | -0.776499000 | 0.239265000  |

*Sum of electronic and zero-point Energies=* -326.710050  
*Sum of electronic and thermal Energies=* -326.703384  
*Sum of electronic and thermal Enthalpies=* -326.702439  
*Sum of electronic and thermal Free Energies=* -326.740196

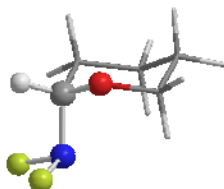

|   |              |              |              |
|---|--------------|--------------|--------------|
| C | 1.345467000  | -1.283646000 | -0.304480000 |
| O | 0.372118000  | -1.155385000 | 0.730810000  |
| H | 3.018338000  | -0.250307000 | -1.146676000 |
| H | 0.841894000  | -1.371492000 | -1.274410000 |
| C | -0.359096000 | 0.019815000  | 0.719953000  |
| H | 1.849103000  | -2.228595000 | -0.097606000 |
| N | -1.266819000 | -0.017606000 | -0.465304000 |
| C | 0.501257000  | 1.271710000  | 0.657625000  |
| C | 1.551395000  | 1.187100000  | -0.441408000 |
| C | 2.315970000  | -0.122710000 | -0.318046000 |
| H | -0.992294000 | 0.006964000  | 1.612035000  |
| H | -0.133241000 | 2.151970000  | 0.548286000  |
| H | 0.992800000  | 1.347425000  | 1.632528000  |
| H | 2.227965000  | 2.042624000  | -0.374730000 |
| H | 1.067823000  | 1.239482000  | -1.422208000 |
| H | 2.900452000  | -0.128896000 | 0.608590000  |
| F | -2.125533000 | -1.069335000 | -0.209477000 |
| F | -2.098023000 | 1.083061000  | -0.296860000 |

*Sum of electronic and zero-point Energies=* -524.978468  
*Sum of electronic and thermal Energies=* -524.970380  
*Sum of electronic and thermal Enthalpies=* -524.969436  
*Sum of electronic and thermal Free Energies=* -525.011542

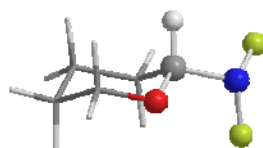

|   |              |              |              |
|---|--------------|--------------|--------------|
| C | 1.800861000  | -1.116322000 | -0.361197000 |
| O | 0.421627000  | -1.237050000 | -0.058702000 |
| H | 1.927434000  | -1.026423000 | -1.451692000 |
| H | 2.255106000  | -2.056210000 | -0.045566000 |
| C | -0.296789000 | -0.109599000 | -0.442393000 |
| N | -1.709087000 | -0.494917000 | -0.225022000 |
| C | 0.167012000  | 1.146553000  | 0.268740000  |
| C | 1.653900000  | 1.342406000  | -0.007443000 |
| C | 2.424301000  | 0.075411000  | 0.337411000  |
| H | 3.474661000  | 0.160552000  | 0.043996000  |
| H | -0.250547000 | 0.026379000  | -1.535006000 |
| H | 2.032362000  | 2.195760000  | 0.560271000  |
| H | 1.801960000  | 1.582064000  | -1.067707000 |
| H | 2.399439000  | -0.093796000 | 1.418817000  |
| F | -1.923234000 | -0.435590000 | 1.139824000  |
| F | -2.423891000 | 0.603853000  | -0.686094000 |
| H | -0.004753000 | 1.024298000  | 1.340339000  |
| H | -0.416646000 | 2.003137000  | -0.072974000 |

*Sum of electronic and zero-point Energies=* -524.976107  
*Sum of electronic and thermal Energies=* -524.968012  
*Sum of electronic and thermal Enthalpies=* -524.967068  
*Sum of electronic and thermal Free Energies=* -525.009108



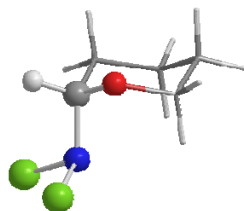

|    |              |              |              |
|----|--------------|--------------|--------------|
| C  | 1.746284000  | -1.277764000 | -0.324245000 |
| O  | 0.886693000  | -1.116052000 | 0.802881000  |
| H  | 3.328935000  | -0.273678000 | -1.356532000 |
| H  | 1.143981000  | -1.377394000 | -1.234542000 |
| C  | 0.151163000  | 0.057362000  | 0.829437000  |
| H  | 2.257163000  | -2.225551000 | -0.150406000 |
| N  | -0.836372000 | 0.011531000  | -0.296095000 |
| C  | 1.037455000  | 1.290223000  | 0.694530000  |
| C  | 1.968557000  | 1.189859000  | -0.504536000 |
| C  | 2.723702000  | -0.130282000 | -0.456783000 |
| H  | -0.387273000 | 0.057530000  | 1.783256000  |
| H  | 0.433686000  | 2.196526000  | 0.664055000  |
| H  | 1.625066000  | 1.327317000  | 1.617680000  |
| H  | 2.661732000  | 2.034809000  | -0.506973000 |
| H  | 1.387410000  | 1.250597000  | -1.430136000 |
| H  | 3.406788000  | -0.137339000 | 0.399803000  |
| Cl | -1.799737000 | -1.426192000 | -0.141132000 |
| Cl | -1.897874000 | 1.380222000  | -0.186340000 |

*Sum of electronic and zero-point Energies=* -1245.572635  
*Sum of electronic and thermal Energies=* -1245.563876  
*Sum of electronic and thermal Enthalpies=* -1245.562932  
*Sum of electronic and thermal Free Energies=* -1245.607368

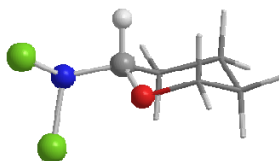

|    |              |              |              |
|----|--------------|--------------|--------------|
| C  | -0.859225000 | 1.758443000  | 1.333027000  |
| C  | -2.354225000 | 2.049825000  | 1.244691000  |
| H  | -0.693784000 | 0.888733000  | 1.980553000  |
| H  | -0.342557000 | 2.599524000  | 1.801550000  |
| C  | -3.032941000 | 0.921002000  | 0.489710000  |
| H  | -2.523674000 | 2.985138000  | 0.705606000  |
| H  | -2.802947000 | 2.144191000  | 2.235920000  |
| N  | -4.471105000 | 1.136733000  | 0.426798000  |
| O  | -2.483761000 | 0.738634000  | -0.781295000 |
| C  | -1.111910000 | 0.394706000  | -0.732301000 |
| C  | -0.293383000 | 1.473660000  | -0.050976000 |
| H  | 0.751792000  | 1.156619000  | 0.010042000  |
| H  | -2.944884000 | -0.011321000 | 1.071267000  |
| H  | -0.804563000 | 0.245295000  | -1.768252000 |
| H  | -0.992317000 | -0.563661000 | -0.202177000 |
| H  | -0.325207000 | 2.381868000  | -0.661568000 |
| Cl | -4.869269000 | 2.510969000  | -0.556287000 |
| Cl | -5.245342000 | -0.270356000 | -0.237309000 |

*Sum of electronic and zero-point Energies=* -1245.573993  
*Sum of electronic and thermal Energies=* -1245.565196  
*Sum of electronic and thermal Enthalpies=* -1245.564251  
*Sum of electronic and thermal Free Energies=* -1245.608632

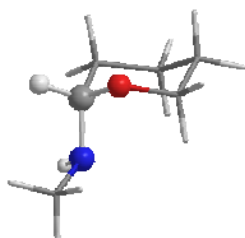

|   |              |              |              |
|---|--------------|--------------|--------------|
| C | -0.781696000 | 1.409302000  | -0.160229000 |
| O | 0.089530000  | 0.937368000  | 0.853315000  |
| H | -2.651856000 | 0.917226000  | -1.092975000 |
| H | -0.250932000 | 1.450340000  | -1.119635000 |
| C | 0.551315000  | -0.380677000 | 0.642383000  |
| H | -1.043694000 | 2.428052000  | 0.132498000  |
| N | 1.400692000  | -0.433493000 | -0.522407000 |
| C | -0.611525000 | -1.357194000 | 0.510510000  |
| C | -1.603829000 | -0.905683000 | -0.553368000 |
| C | -2.014860000 | 0.536382000  | -0.288733000 |
| H | 1.114927000  | -0.597645000 | 1.564741000  |
| H | -0.229976000 | -2.362059000 | 0.300752000  |
| H | -1.111654000 | -1.404705000 | 1.482665000  |
| H | -2.476381000 | -1.565023000 | -0.559907000 |
| H | -1.141838000 | -0.974757000 | -1.543261000 |
| H | -2.593152000 | 0.593931000  | 0.640488000  |
| C | 2.676274000  | 0.228410000  | -0.352234000 |
| H | 1.524032000  | -1.391526000 | -0.819444000 |
| H | 3.269632000  | -0.167198000 | 0.488156000  |
| H | 2.510363000  | 1.290888000  | -0.167414000 |
| H | 3.265371000  | 0.134743000  | -1.266303000 |

*Sum of electronic and zero-point Energies=* -365.944728  
*Sum of electronic and thermal Energies=* -365.936628  
*Sum of electronic and thermal Enthalpies=* -365.935684  
*Sum of electronic and thermal Free Energies=* -365.977059

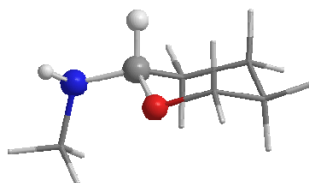

|   |              |              |              |
|---|--------------|--------------|--------------|
| C | -1.610193000 | 1.199234000  | -0.114496000 |
| C | -0.089965000 | 1.263891000  | -0.037620000 |
| H | -1.921765000 | 1.228326000  | -1.166160000 |
| H | -2.055285000 | 2.074324000  | 0.366666000  |
| C | 0.523970000  | 0.001669000  | -0.620416000 |
| H | 0.217579000  | 1.360115000  | 1.008073000  |
| H | 0.299358000  | 2.129745000  | -0.579243000 |
| N | 1.948148000  | 0.000359000  | -0.587455000 |
| O | 0.011094000  | -1.151741000 | 0.051235000  |
| C | -1.386947000 | -1.277087000 | -0.073560000 |
| C | -2.115382000 | -0.087364000 | 0.522348000  |
| H | -3.193648000 | -0.203017000 | 0.374974000  |
| H | 0.226385000  | -0.073770000 | -1.679871000 |
| H | -1.660368000 | -2.207344000 | 0.429466000  |
| H | -1.657200000 | -1.380690000 | -1.138416000 |
| H | -1.933779000 | -0.065471000 | 1.602397000  |
| C | 2.575128000  | 0.052066000  | 0.721893000  |
| H | 2.284324000  | -0.806037000 | -1.096668000 |
| H | 2.200378000  | -0.702248000 | 1.424825000  |
| H | 2.439324000  | 1.038397000  | 1.169899000  |
| H | 3.649240000  | -0.095365000 | 0.597460000  |

*Sum of electronic and zero-point Energies=* -365.946396  
*Sum of electronic and thermal Energies=* -365.938294

Sum of electronic and thermal Enthalpies= -365.937350  
 Sum of electronic and thermal Free Energies= -365.978747

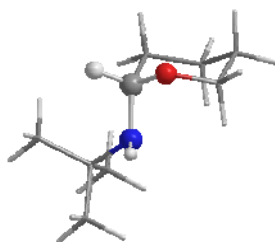

|   |              |              |              |
|---|--------------|--------------|--------------|
| C | -1.284433000 | 1.098510000  | 1.108493000  |
| O | -2.674444000 | 1.047682000  | 0.822959000  |
| C | -2.994249000 | 0.503576000  | -0.440062000 |
| N | -2.667899000 | -0.914101000 | -0.398442000 |
| C | -2.289870000 | 1.277310000  | -1.547754000 |
| C | -0.788564000 | 1.350470000  | -1.315242000 |
| C | -0.522869000 | 1.906512000  | 0.076923000  |
| H | -4.076742000 | 0.675897000  | -0.525393000 |
| C | -3.161279000 | -1.841843000 | -1.430895000 |
| C | -2.156832000 | -1.951318000 | -2.578674000 |
| H | -0.874627000 | 0.082516000  | 1.161771000  |
| H | -1.211712000 | 1.549834000  | 2.100184000  |
| H | -3.001221000 | -1.235156000 | 0.503444000  |
| H | -2.526984000 | 0.848700000  | -2.523092000 |
| H | -2.710937000 | 2.288546000  | -1.539613000 |
| H | -0.315850000 | 1.973407000  | -2.079720000 |
| H | -0.354078000 | 0.349603000  | -1.398528000 |
| H | 0.545099000  | 1.885494000  | 0.315105000  |
| H | -0.847641000 | 2.952062000  | 0.126806000  |
| C | -4.541561000 | -1.470619000 | -1.979647000 |
| C | -3.250977000 | -3.207651000 | -0.754845000 |
| H | -1.175297000 | -2.230273000 | -2.190464000 |
| H | -2.049849000 | -1.015339000 | -3.127822000 |
| H | -2.477816000 | -2.715223000 | -3.291981000 |
| H | -3.999723000 | -3.201197000 | 0.043350000  |
| H | -2.286069000 | -3.480394000 | -0.320369000 |
| H | -3.533992000 | -3.978861000 | -1.473991000 |
| H | -4.527906000 | -0.516592000 | -2.512195000 |
| H | -5.278950000 | -1.399532000 | -1.175300000 |
| H | -4.885424000 | -2.232519000 | -2.683602000 |

Sum of electronic and zero-point Energies= -483.692787  
 Sum of electronic and thermal Energies= -483.680900  
 Sum of electronic and thermal Enthalpies= -483.679956  
 Sum of electronic and thermal Free Energies= -483.729722

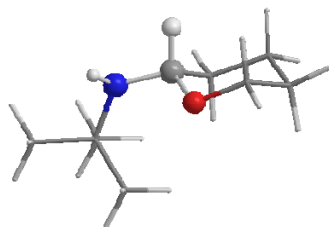

|   |              |             |              |
|---|--------------|-------------|--------------|
| C | -0.571237000 | 1.863008000 | 1.239526000  |
| C | -1.979247000 | 2.410675000 | 1.036222000  |
| C | -2.891842000 | 1.311004000 | 0.517378000  |
| N | -4.265329000 | 1.654818000 | 0.379163000  |
| O | -2.361947000 | 0.778266000 | -0.705190000 |
| C | -1.093358000 | 0.191994000 | -0.526673000 |
| C | -0.070975000 | 1.199838000 | -0.035578000 |
| H | -2.864258000 | 0.487644000 | 1.252840000  |
| C | -4.779894000 | 2.773177000 | -0.429603000 |
| C | -4.089320000 | 2.951011000 | -1.784090000 |

|   |              |              |              |
|---|--------------|--------------|--------------|
| H | -0.585027000 | 1.124101000  | 2.050468000  |
| H | 0.105888000  | 2.661050000  | 1.555977000  |
| H | -1.946349000 | 3.228759000  | 0.312021000  |
| H | -2.386006000 | 2.806688000  | 1.969708000  |
| H | -4.778738000 | 0.814875000  | 0.150369000  |
| H | -0.807657000 | -0.230421000 | -1.492643000 |
| H | -1.166600000 | -0.640390000 | 0.194429000  |
| H | 0.889561000  | 0.702260000  | 0.130524000  |
| H | 0.083632000  | 1.955659000  | -0.813329000 |
| C | -4.716129000 | 4.078707000  | 0.365146000  |
| C | -6.251697000 | 2.445425000  | -0.672736000 |
| H | -4.141598000 | 2.032648000  | -2.371174000 |
| H | -3.035069000 | 3.206331000  | -1.672543000 |
| H | -4.574609000 | 3.754148000  | -2.346397000 |
| H | -6.774419000 | 2.299866000  | 0.275937000  |
| H | -6.354739000 | 1.533848000  | -1.269636000 |
| H | -6.741362000 | 3.256325000  | -1.215090000 |
| H | -3.691733000 | 4.409464000  | 0.535741000  |
| H | -5.199108000 | 3.951445000  | 1.336168000  |
| H | -5.232134000 | 4.874477000  | -0.178636000 |

*Sum of electronic and zero-point Energies=* -483.695902  
*Sum of electronic and thermal Energies=* -483.683974  
*Sum of electronic and thermal Enthalpies=* -483.683030  
*Sum of electronic and thermal Free Energies=* -483.732640

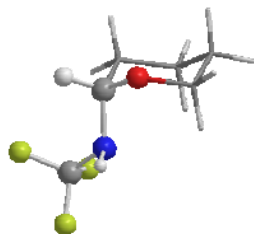

|   |              |              |              |
|---|--------------|--------------|--------------|
| C | 2.258900000  | -1.017632000 | -0.565176000 |
| O | 1.479971000  | -1.330315000 | 0.584854000  |
| H | 3.387356000  | 0.588383000  | -1.418909000 |
| H | 1.648892000  | -1.133318000 | -1.469721000 |
| C | 0.418584000  | -0.452138000 | 0.830721000  |
| H | 3.046869000  | -1.772071000 | -0.586417000 |
| N | -0.582158000 | -0.682791000 | -0.222456000 |
| C | 0.875367000  | 0.996450000  | 0.907734000  |
| C | 1.703712000  | 1.391144000  | -0.305614000 |
| C | 2.828229000  | 0.384043000  | -0.501082000 |
| H | 0.022411000  | -0.763628000 | 1.803490000  |
| H | 0.018214000  | 1.657969000  | 1.044568000  |
| H | 1.485574000  | 1.075727000  | 1.813085000  |
| H | 2.102714000  | 2.400046000  | -0.173904000 |
| H | 1.067857000  | 1.412952000  | -1.195927000 |
| H | 3.536134000  | 0.447858000  | 0.332741000  |
| H | -0.734071000 | -1.677674000 | -0.329637000 |
| C | -1.808978000 | -0.027913000 | -0.166385000 |
| F | -2.353753000 | 0.044163000  | 1.073067000  |
| F | -2.691551000 | -0.667930000 | -0.939203000 |
| F | -1.732640000 | 1.239555000  | -0.594108000 |

*Sum of electronic and zero-point Energies=* -663.579616  
*Sum of electronic and thermal Energies=* -663.569857  
*Sum of electronic and thermal Enthalpies=* -663.568913  
*Sum of electronic and thermal Free Energies=* -663.615602

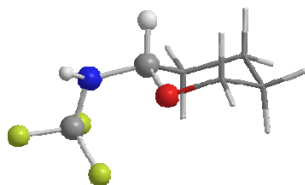

|   |              |              |              |
|---|--------------|--------------|--------------|
| C | -2.348974000 | 1.265760000  | -0.125728000 |
| C | -0.829428000 | 1.189547000  | -0.214120000 |
| H | -2.772230000 | 1.283656000  | -1.137748000 |
| H | -2.650542000 | 2.199532000  | 0.355083000  |
| C | -0.426646000 | -0.156786000 | -0.790241000 |
| H | -0.396697000 | 1.298887000  | 0.783722000  |
| H | -0.427378000 | 1.989034000  | -0.840172000 |
| N | 0.989797000  | -0.336326000 | -0.942771000 |
| O | -0.947297000 | -1.222548000 | -0.016495000 |
| C | -2.359868000 | -1.216520000 | 0.019381000  |
| C | -2.897485000 | 0.063247000  | 0.629036000  |
| H | -3.991207000 | 0.050542000  | 0.605813000  |
| H | -0.850068000 | -0.239235000 | -1.804897000 |
| H | -2.651628000 | -2.094317000 | 0.598391000  |
| H | -2.755787000 | -1.339271000 | -1.002639000 |
| H | -2.592664000 | 0.110644000  | 1.679618000  |
| C | 1.892177000  | -0.000780000 | 0.069398000  |
| H | 1.216357000  | -1.244478000 | -1.322414000 |
| F | 2.080296000  | 1.323689000  | 0.153985000  |
| F | 3.072902000  | -0.564593000 | -0.209774000 |
| F | 1.551578000  | -0.397666000 | 1.310261000  |

*Sum of electronic and zero-point Energies=* -663.581429  
*Sum of electronic and thermal Energies=* -663.571597  
*Sum of electronic and thermal Enthalpies=* -663.570653  
*Sum of electronic and thermal Free Energies=* -663.617269

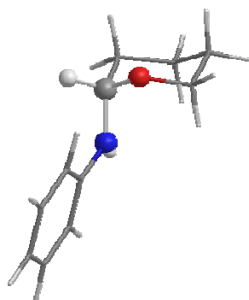

|   |              |              |              |
|---|--------------|--------------|--------------|
| C | -2.153462000 | 1.104136000  | -0.970351000 |
| O | -1.450073000 | 1.267987000  | 0.246582000  |
| H | -3.941611000 | 0.185184000  | -1.730105000 |
| H | -1.510266000 | 0.603331000  | -1.706448000 |
| C | -1.062668000 | 0.045260000  | 0.847858000  |
| H | -2.358131000 | 2.113490000  | -1.331478000 |
| N | -0.108423000 | -0.673924000 | 0.054801000  |
| C | -2.284642000 | -0.821692000 | 1.128117000  |
| C | -3.123067000 | -1.029716000 | -0.128306000 |
| C | -3.434012000 | 0.316319000  | -0.769780000 |
| H | -0.599836000 | 0.362094000  | 1.790072000  |
| H | -1.972958000 | -1.773123000 | 1.569797000  |
| H | -2.883635000 | -0.301069000 | 1.880334000  |
| H | -4.042806000 | -1.566357000 | 0.119735000  |
| H | -2.583842000 | -1.657340000 | -0.847474000 |
| H | -4.106399000 | 0.888030000  | -0.120591000 |
| C | 1.232694000  | -0.338143000 | 0.008907000  |
| H | -0.310998000 | -1.645002000 | -0.108002000 |
| C | 2.168057000  | -1.281846000 | -0.429254000 |
| C | 3.512738000  | -0.967128000 | -0.491920000 |
| C | 3.963254000  | 0.292046000  | -0.117554000 |

|   |             |              |              |
|---|-------------|--------------|--------------|
| C | 3.038639000 | 1.231412000  | 0.312018000  |
| C | 1.686039000 | 0.933078000  | 0.372613000  |
| H | 1.829735000 | -2.272843000 | -0.717857000 |
| H | 4.217568000 | -1.717780000 | -0.832543000 |
| H | 5.017345000 | 0.536852000  | -0.165804000 |
| H | 3.369747000 | 2.223699000  | 0.598790000  |
| H | 0.974217000 | 1.692042000  | 0.671225000  |

*Sum of electronic and zero-point Energies=* -557.479859  
*Sum of electronic and thermal Energies=* -557.468688  
*Sum of electronic and thermal Enthalpies=* -557.467744  
*Sum of electronic and thermal Free Energies=* -557.517439

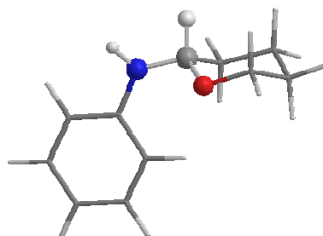

|   |              |              |              |
|---|--------------|--------------|--------------|
| C | 3.004480000  | 0.120283000  | 1.243529000  |
| C | 1.536421000  | -0.287328000 | 1.258152000  |
| H | 3.630596000  | -0.780878000 | 1.221514000  |
| H | 3.260899000  | 0.654236000  | 2.162308000  |
| C | 1.149454000  | -0.926504000 | -0.070920000 |
| H | 0.904247000  | 0.583429000  | 1.445437000  |
| H | 1.337201000  | -1.007398000 | 2.055807000  |
| N | -0.207052000 | -1.346665000 | -0.134135000 |
| O | 1.458168000  | -0.067860000 | -1.162422000 |
| C | 2.831514000  | 0.248937000  | -1.231327000 |
| C | 3.309464000  | 0.966216000  | 0.016270000  |
| H | 4.381541000  | 1.170229000  | -0.064154000 |
| H | 1.751723000  | -1.843281000 | -0.184687000 |
| H | 2.957313000  | 0.865019000  | -2.123898000 |
| H | 3.417341000  | -0.674807000 | -1.375750000 |
| H | 2.798763000  | 1.932532000  | 0.088783000  |
| C | -1.333341000 | -0.534060000 | -0.072726000 |
| H | -0.355217000 | -2.215277000 | -0.616792000 |
| C | -1.285898000 | 0.861589000  | -0.068223000 |
| C | -2.455730000 | 1.600387000  | 0.027112000  |
| C | -3.693381000 | 0.980760000  | 0.095460000  |
| C | -3.747184000 | -0.406421000 | 0.065432000  |
| C | -2.586658000 | -1.153494000 | -0.009442000 |
| H | -0.337464000 | 1.366601000  | -0.184554000 |
| H | -2.392704000 | 2.683294000  | 0.028068000  |
| H | -4.601918000 | 1.566970000  | 0.162029000  |
| H | -4.703828000 | -0.915325000 | 0.111344000  |
| H | -2.639325000 | -2.238004000 | -0.007049000 |

*Sum of electronic and zero-point Energies=* -557.475880  
*Sum of electronic and thermal Energies=* -557.464648  
*Sum of electronic and thermal Enthalpies=* -557.463703  
*Sum of electronic and thermal Free Energies=* -557.513409

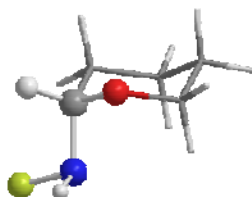

|   |             |              |              |
|---|-------------|--------------|--------------|
| C | 1.398009000 | -1.095695000 | -0.358291000 |
| O | 0.380826000 | -1.263789000 | 0.627991000  |
| H | 2.820342000 | 0.341150000  | -1.052058000 |

|   |              |              |              |
|---|--------------|--------------|--------------|
| H | 0.972347000  | -1.229311000 | -1.359801000 |
| C | -0.600444000 | -0.266825000 | 0.654559000  |
| H | 2.101141000  | -1.909879000 | -0.175055000 |
| N | -1.418764000 | -0.476634000 | -0.547442000 |
| C | -0.042978000 | 1.143527000  | 0.695335000  |
| C | 1.028425000  | 1.358624000  | -0.362724000 |
| C | 2.071514000  | 0.255884000  | -0.259027000 |
| H | -1.196455000 | -0.461556000 | 1.554326000  |
| H | -0.869033000 | 1.849303000  | 0.583497000  |
| H | 0.381820000  | 1.296590000  | 1.692722000  |
| H | 1.486107000  | 2.343359000  | -0.238981000 |
| H | 0.572065000  | 1.338644000  | -1.357284000 |
| H | 2.600345000  | 0.327912000  | 0.698043000  |
| H | -1.777181000 | -1.428893000 | -0.483700000 |
| F | -2.592657000 | 0.289592000  | -0.363628000 |

*Sum of electronic and zero-point Energies=* -425.832938  
*Sum of electronic and thermal Energies=* -425.825516  
*Sum of electronic and thermal Enthalpies=* -425.824572  
*Sum of electronic and thermal Free Energies=* -425.864823

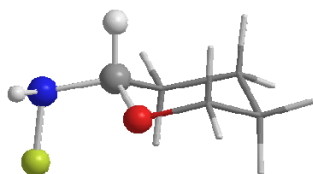

|   |              |              |              |
|---|--------------|--------------|--------------|
| C | 1.550886000  | 1.210537000  | 0.152829000  |
| C | 0.031040000  | 1.256630000  | 0.062335000  |
| H | 1.856164000  | 1.227363000  | 1.206658000  |
| H | 1.984234000  | 2.099832000  | -0.311499000 |
| C | -0.560771000 | -0.034121000 | 0.594802000  |
| H | -0.283761000 | 1.370386000  | -0.977759000 |
| H | -0.379673000 | 2.096160000  | 0.627983000  |
| N | -1.991902000 | -0.044061000 | 0.540470000  |
| O | -0.032780000 | -1.166293000 | -0.062248000 |
| C | 1.370613000  | -1.268318000 | 0.072222000  |
| C | 2.078753000  | -0.057502000 | -0.502764000 |
| H | 3.157650000  | -0.158927000 | -0.351984000 |
| H | -0.352805000 | -0.118503000 | 1.677529000  |
| H | 1.657895000  | -2.186564000 | -0.442966000 |
| H | 1.632229000  | -1.383790000 | 1.137383000  |
| H | 1.900488000  | -0.022241000 | -1.582560000 |
| F | -2.387889000 | 0.118958000  | -0.807498000 |
| H | -2.298992000 | -0.998920000 | 0.722843000  |

*Sum of electronic and zero-point Energies=* -425.836859  
*Sum of electronic and thermal Energies=* -425.829492  
*Sum of electronic and thermal Enthalpies=* -425.828548  
*Sum of electronic and thermal Free Energies=* -425.868596

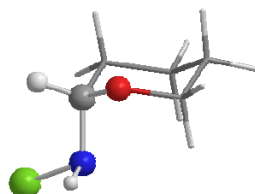

|   |              |              |              |
|---|--------------|--------------|--------------|
| C | 1.808091000  | -1.021567000 | -0.431386000 |
| O | 0.874269000  | -1.271553000 | 0.616922000  |
| H | 3.079702000  | 0.520244000  | -1.191657000 |
| H | 1.323531000  | -1.166385000 | -1.404233000 |
| C | -0.173036000 | -0.349107000 | 0.721887000  |
| H | 2.573309000  | -1.790608000 | -0.313579000 |
| N | -1.046218000 | -0.592056000 | -0.439975000 |

|    |              |              |              |
|----|--------------|--------------|--------------|
| C  | 0.301574000  | 1.092653000  | 0.770319000  |
| C  | 1.279938000  | 1.402079000  | -0.352520000 |
| C  | 2.397541000  | 0.369890000  | -0.349636000 |
| H  | -0.689679000 | -0.605524000 | 1.654821000  |
| H  | -0.564574000 | 1.757268000  | 0.744316000  |
| H  | 0.789196000  | 1.237375000  | 1.739695000  |
| H  | 1.680053000  | 2.412174000  | -0.233396000 |
| H  | 0.757024000  | 1.374512000  | -1.313660000 |
| H  | 2.988343000  | 0.459998000  | 0.568864000  |
| H  | -1.255318000 | -1.587064000 | -0.438792000 |
| Cl | -2.590403000 | 0.161244000  | -0.224701000 |

*Sum of electronic and zero-point Energies=* -786.140174  
*Sum of electronic and thermal Energies=* -786.132525  
*Sum of electronic and thermal Enthalpies=* -786.131581  
*Sum of electronic and thermal Free Energies=* -786.172884

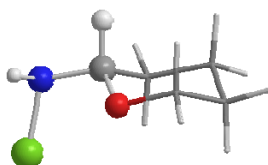

|    |              |              |              |
|----|--------------|--------------|--------------|
| C  | 1.901441000  | 1.211225000  | 0.059301000  |
| C  | 0.382559000  | 1.255572000  | 0.170028000  |
| H  | 2.342933000  | 1.215773000  | 1.063765000  |
| H  | 2.269535000  | 2.107064000  | -0.446873000 |
| C  | -0.135063000 | -0.039673000 | 0.762131000  |
| H  | -0.062600000 | 1.383170000  | -0.820417000 |
| H  | 0.050035000  | 2.088748000  | 0.793707000  |
| N  | -1.563531000 | -0.059939000 | 0.914247000  |
| O  | 0.303521000  | -1.164233000 | 0.030662000  |
| C  | 1.712305000  | -1.265922000 | -0.025509000 |
| C  | 2.337882000  | -0.047864000 | -0.675664000 |
| H  | 3.427278000  | -0.149131000 | -0.670769000 |
| H  | 0.230543000  | -0.132795000 | 1.801724000  |
| H  | 1.926889000  | -2.177810000 | -0.585493000 |
| H  | 2.114372000  | -1.393830000 | 0.993332000  |
| H  | 2.017601000  | -0.000392000 | -1.721678000 |
| Cl | -2.421326000 | 0.063955000  | -0.591686000 |
| H  | -1.832238000 | -0.974631000 | 1.264618000  |

*Sum of electronic and zero-point Energies=* -786.142779  
*Sum of electronic and thermal Energies=* -786.135136  
*Sum of electronic and thermal Enthalpies=* -786.134192  
*Sum of electronic and thermal Free Energies=* -786.175426

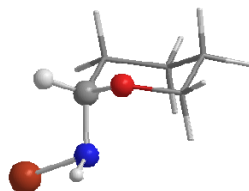

|   |              |              |              |
|---|--------------|--------------|--------------|
| C | 2.406308000  | -0.979638000 | -0.470327000 |
| O | 1.514602000  | -1.275228000 | 0.602515000  |
| H | 3.595966000  | 0.616475000  | -1.250837000 |
| H | 1.898212000  | -1.131904000 | -1.429779000 |
| C | 0.436366000  | -0.392623000 | 0.751278000  |
| H | 3.202105000  | -1.721402000 | -0.384331000 |
| N | -0.456578000 | -0.653043000 | -0.391264000 |
| C | 0.864905000  | 1.063622000  | 0.806985000  |
| C | 1.793632000  | 1.422171000  | -0.342873000 |
| C | 2.947293000  | 0.431420000  | -0.389493000 |
| H | -0.037244000 | -0.680862000 | 1.697360000  |
| H | -0.021654000 | 1.701371000  | 0.821499000  |



|    |              |              |              |
|----|--------------|--------------|--------------|
| H  | 1.380728000  | 1.209673000  | 1.761425000  |
| H  | 2.161006000  | 2.444584000  | -0.223347000 |
| H  | 1.240880000  | 1.387239000  | -1.286929000 |
| H  | 3.563875000  | 0.532416000  | 0.510782000  |
| H  | -0.631376000 | -1.654981000 | -0.391774000 |
| Br | -2.170408000 | 0.080023000  | -0.115393000 |

*Sum of electronic and zero-point Energies=* -2899.942248  
*Sum of electronic and thermal Energies=* -2899.934418  
*Sum of electronic and thermal Enthalpies=* -2899.933474  
*Sum of electronic and thermal Free Energies=* -2899.976076

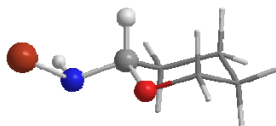

|    |              |              |              |
|----|--------------|--------------|--------------|
| C  | 2.871247000  | 0.834573000  | 0.396804000  |
| C  | 1.547244000  | 1.375619000  | -0.133238000 |
| H  | 2.836301000  | 0.804144000  | 1.492488000  |
| H  | 3.687476000  | 1.510043000  | 0.128432000  |
| C  | 0.442422000  | 0.360036000  | 0.128989000  |
| H  | 1.603152000  | 1.542053000  | -1.213243000 |
| H  | 1.302448000  | 2.329315000  | 0.345179000  |
| N  | -0.769163000 | 0.823772000  | -0.502699000 |
| O  | 0.749255000  | -0.879046000 | -0.444968000 |
| C  | 1.915690000  | -1.446729000 | 0.111620000  |
| C  | 3.126592000  | -0.567747000 | -0.138102000 |
| H  | 4.008751000  | -1.009980000 | 0.334256000  |
| H  | 0.324566000  | 0.222622000  | 1.221019000  |
| H  | 2.025779000  | -2.426908000 | -0.354749000 |
| H  | 1.775990000  | -1.600792000 | 1.193842000  |
| H  | 3.317247000  | -0.527906000 | -1.215554000 |
| Br | -2.284561000 | -0.133776000 | 0.089643000  |
| H  | -0.951141000 | 1.771021000  | -0.186994000 |

*Sum of electronic and zero-point Energies=* -2899.942197  
*Sum of electronic and thermal Energies=* -2899.934331  
*Sum of electronic and thermal Enthalpies=* -2899.933387  
*Sum of electronic and thermal Free Energies=* -2899.976086

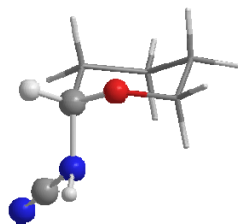

|   |              |              |              |
|---|--------------|--------------|--------------|
| C | 1.715783000  | -0.767551000 | -0.666520000 |
| O | 1.008677000  | -1.306515000 | 0.446749000  |
| H | 2.597759000  | 1.060201000  | -1.344338000 |
| H | 1.108369000  | -0.872405000 | -1.574395000 |
| C | -0.147825000 | -0.612082000 | 0.795791000  |
| H | 2.598952000  | -1.398821000 | -0.772680000 |
| N | -1.152058000 | -0.850079000 | -0.260275000 |
| C | 0.082281000  | 0.873862000  | 1.009297000  |
| C | 0.833782000  | 1.499495000  | -0.156875000 |
| C | 2.084869000  | 0.685093000  | -0.454074000 |
| H | -0.482460000 | -1.079186000 | 1.728090000  |
| H | -0.872542000 | 1.373963000  | 1.189054000  |
| H | 0.672268000  | 0.967175000  | 1.925812000  |
| H | 1.088153000  | 2.535610000  | 0.078519000  |
| H | 0.190709000  | 1.527021000  | -1.042551000 |
| H | 2.788172000  | 0.759816000  | 0.382610000  |
| H | -1.281958000 | -1.829595000 | -0.473106000 |

|   |              |              |              |
|---|--------------|--------------|--------------|
| C | -2.252401000 | -0.110726000 | -0.337213000 |
| N | -3.187338000 | 0.564335000  | -0.427360000 |

*Sum of electronic and zero-point Energies=* -418.867830  
*Sum of electronic and thermal Energies=* -418.859540  
*Sum of electronic and thermal Enthalpies=* -418.858595  
*Sum of electronic and thermal Free Energies=* -418.901385

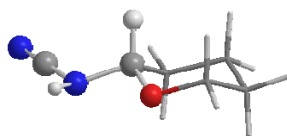

|   |              |              |              |
|---|--------------|--------------|--------------|
| C | 1.489113000  | 1.444258000  | 0.185553000  |
| C | 0.073255000  | 1.073585000  | -0.237684000 |
| H | 1.525560000  | 1.562847000  | 1.275233000  |
| H | 1.769531000  | 2.409447000  | -0.242103000 |
| C | -0.245776000 | -0.319159000 | 0.264796000  |
| H | -0.014890000 | 1.064679000  | -1.328446000 |
| H | -0.657908000 | 1.786601000  | 0.151878000  |
| N | -1.528240000 | -0.796592000 | -0.230431000 |
| O | 0.670534000  | -1.270329000 | -0.199381000 |
| C | 1.986937000  | -0.996714000 | 0.247208000  |
| C | 2.467249000  | 0.356709000  | -0.239054000 |
| H | 3.467731000  | 0.551538000  | 0.157855000  |
| H | -0.231299000 | -0.322623000 | 1.370865000  |
| H | 2.605420000  | -1.808755000 | -0.137176000 |
| H | 2.016815000  | -1.037284000 | 1.347382000  |
| H | 2.547930000  | 0.332673000  | -1.330684000 |
| C | -2.621658000 | -0.071553000 | -0.021295000 |
| H | -1.644098000 | -1.797205000 | -0.145603000 |
| N | -3.563730000 | 0.582015000  | 0.127388000  |

*Sum of electronic and zero-point Energies=* -418.867685  
*Sum of electronic and thermal Energies=* -418.859281  
*Sum of electronic and thermal Enthalpies=* -418.858336  
*Sum of electronic and thermal Free Energies=* -418.901383

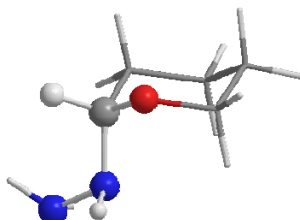

|   |              |              |              |
|---|--------------|--------------|--------------|
| C | 1.406000000  | -1.081447000 | -0.384937000 |
| O | 0.433463000  | -1.262384000 | 0.636493000  |
| H | 2.791516000  | 0.378776000  | -1.116947000 |
| H | 0.941047000  | -1.204927000 | -1.370682000 |
| C | -0.578055000 | -0.290923000 | 0.660549000  |
| H | 2.124248000  | -1.890922000 | -0.241665000 |
| N | -1.423972000 | -0.474937000 | -0.511799000 |
| C | -0.018867000 | 1.122892000  | 0.738095000  |
| C | 1.019985000  | 1.371677000  | -0.345307000 |
| C | 2.074190000  | 0.275063000  | -0.297209000 |
| H | -1.145252000 | -0.504977000 | 1.583687000  |
| H | -0.839761000 | 1.843209000  | 0.678744000  |
| H | 0.436295000  | 1.244119000  | 1.726341000  |
| H | 1.474681000  | 2.357474000  | -0.215492000 |
| H | 0.534902000  | 1.365526000  | -1.326651000 |
| H | 2.638124000  | 0.339791000  | 0.640225000  |
| H | -1.597089000 | -1.467976000 | -0.614400000 |
| N | -2.669706000 | 0.175431000  | -0.452895000 |
| H | -2.571445000 | 1.115075000  | -0.812625000 |
| H | -3.018747000 | 0.236873000  | 0.503241000  |

Sum of electronic and zero-point Energies= -381.964084  
 Sum of electronic and thermal Energies= -381.956304  
 Sum of electronic and thermal Enthalpies= -381.955360  
 Sum of electronic and thermal Free Energies= -381.996018

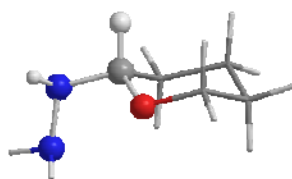

|   |              |              |              |
|---|--------------|--------------|--------------|
| C | -1.603261000 | 1.197946000  | -0.092267000 |
| C | -0.083174000 | 1.274078000  | -0.033812000 |
| H | -1.934096000 | 1.240814000  | -1.138009000 |
| H | -2.046881000 | 2.062163000  | 0.409495000  |
| C | 0.538213000  | 0.023091000  | -0.624057000 |
| H | 0.260839000  | 1.363867000  | 0.999026000  |
| H | 0.291134000  | 2.141946000  | -0.582872000 |
| N | 1.962796000  | 0.021109000  | -0.547492000 |
| O | 0.030349000  | -1.149760000 | 0.012406000  |
| C | -1.369439000 | -1.275284000 | -0.100665000 |
| C | -2.091985000 | -0.101376000 | 0.530974000  |
| H | -3.172106000 | -0.220684000 | 0.400300000  |
| H | 0.288723000  | -0.041023000 | -1.696806000 |
| H | -1.634479000 | -2.218254000 | 0.382815000  |
| H | -1.650523000 | -1.354440000 | -1.164787000 |
| H | -1.889855000 | -0.098950000 | 1.607388000  |
| N | 2.435235000  | 0.090208000  | 0.780509000  |
| H | 2.310731000  | -0.803109000 | -1.028504000 |
| H | 3.377216000  | 0.453665000  | 0.767616000  |
| H | 2.428158000  | -0.817871000 | 1.232931000  |

Sum of electronic and zero-point Energies= -381.968677  
 Sum of electronic and thermal Energies= -381.960869  
 Sum of electronic and thermal Enthalpies= -381.959925  
 Sum of electronic and thermal Free Energies= -382.000588

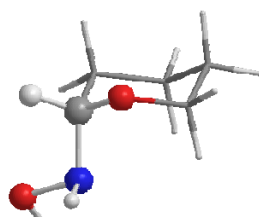

|   |              |              |              |
|---|--------------|--------------|--------------|
| C | 1.399387000  | -1.085187000 | -0.387441000 |
| O | 0.413695000  | -1.268058000 | 0.622011000  |
| H | 2.803046000  | 0.367693000  | -1.095773000 |
| H | 0.946788000  | -1.202699000 | -1.379841000 |
| C | -0.583276000 | -0.283164000 | 0.664055000  |
| H | 2.111526000  | -1.899246000 | -0.239706000 |
| N | -1.428502000 | -0.468522000 | -0.517965000 |
| C | -0.024419000 | 1.127736000  | 0.728612000  |
| C | 1.025768000  | 1.368800000  | -0.345447000 |
| C | 2.073703000  | 0.266997000  | -0.286266000 |
| H | -1.159860000 | -0.492731000 | 1.574340000  |
| H | -0.853292000 | 1.835597000  | 0.654472000  |
| H | 0.421820000  | 1.259836000  | 1.719626000  |
| H | 1.484009000  | 2.352553000  | -0.213084000 |
| H | 0.552052000  | 1.364915000  | -1.332617000 |
| H | 2.625013000  | 0.325727000  | 0.658988000  |
| H | -1.690834000 | -1.451191000 | -0.523965000 |
| O | -2.647339000 | 0.223634000  | -0.294596000 |
| H | -2.718581000 | 0.803495000  | -1.057085000 |

Sum of electronic and zero-point Energies= -401.821897  
 Sum of electronic and thermal Energies= -401.814162  
 Sum of electronic and thermal Enthalpies= -401.813218  
 Sum of electronic and thermal Free Energies= -401.853848

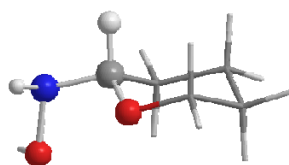

|   |              |              |              |
|---|--------------|--------------|--------------|
| C | 1.549327000  | 1.225905000  | 0.158230000  |
| C | 0.028254000  | 1.245501000  | 0.075342000  |
| H | 1.858526000  | 1.236877000  | 1.211050000  |
| H | 1.966684000  | 2.127151000  | -0.298498000 |
| C | -0.545357000 | -0.057053000 | 0.598729000  |
| H | -0.292168000 | 1.360342000  | -0.963280000 |
| H | -0.389155000 | 2.075835000  | 0.651345000  |
| N | -1.975948000 | -0.093629000 | 0.540407000  |
| O | 0.003716000  | -1.171902000 | -0.082656000 |
| C | 1.405459000  | -1.253631000 | 0.051702000  |
| C | 2.096314000  | -0.026537000 | -0.511311000 |
| H | 3.177147000  | -0.112162000 | -0.363104000 |
| H | -0.309154000 | -0.157737000 | 1.673215000  |
| H | 1.710270000  | -2.162118000 | -0.471550000 |
| H | 1.670980000  | -1.373960000 | 1.116030000  |
| H | 1.915316000  | 0.017169000  | -1.590435000 |
| O | -2.428755000 | 0.053453000  | -0.797470000 |
| H | -2.270900000 | -1.030476000 | 0.801783000  |
| H | -3.009590000 | 0.816963000  | -0.744548000 |

Sum of electronic and zero-point Energies= -401.824718  
 Sum of electronic and thermal Energies= -401.817024  
 Sum of electronic and thermal Enthalpies= -401.816080  
 Sum of electronic and thermal Free Energies= -401.856561

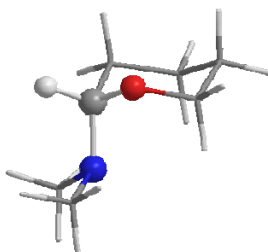

|   |              |              |              |
|---|--------------|--------------|--------------|
| C | 1.290334000  | -1.283990000 | -0.400862000 |
| O | 0.448494000  | -1.192051000 | 0.737374000  |
| H | 2.880875000  | -0.223474000 | -1.375266000 |
| H | 0.681254000  | -1.301231000 | -1.313346000 |
| C | -0.313801000 | -0.006062000 | 0.787282000  |
| H | 1.799024000  | -2.245697000 | -0.308132000 |
| N | -1.277718000 | 0.004672000  | -0.300370000 |
| C | 0.613609000  | 1.203614000  | 0.794742000  |
| C | 1.546634000  | 1.193324000  | -0.407693000 |
| C | 2.282421000  | -0.138966000 | -0.462957000 |
| H | -0.835980000 | -0.067836000 | 1.759596000  |
| H | 0.047650000  | 2.134274000  | 0.864662000  |
| H | 1.203701000  | 1.129113000  | 1.713542000  |
| H | 2.254208000  | 2.024933000  | -0.346256000 |
| H | 0.968507000  | 1.329984000  | -1.327735000 |
| H | 2.970698000  | -0.214600000 | 0.386422000  |
| C | -2.180567000 | -1.123616000 | -0.201392000 |
| C | -2.016887000 | 1.239331000  | -0.424149000 |
| H | -2.844334000 | -1.055603000 | 0.679582000  |
| H | -1.612594000 | -2.049389000 | -0.123921000 |
| H | -2.806217000 | -1.170953000 | -1.095214000 |

|   |              |             |              |
|---|--------------|-------------|--------------|
| H | -1.365293000 | 2.066233000 | -0.707761000 |
| H | -2.552980000 | 1.520704000 | 0.500892000  |
| H | -2.762904000 | 1.125439000 | -1.213279000 |

*Sum of electronic and zero-point Energies=* -405.184067  
*Sum of electronic and thermal Energies=* -405.174814  
*Sum of electronic and thermal Enthalpies=* -405.173870  
*Sum of electronic and thermal Free Energies=* -405.217800

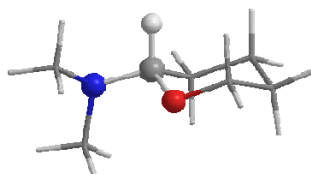

|   |              |              |              |
|---|--------------|--------------|--------------|
| C | -2.053425000 | 0.950638000  | -0.510247000 |
| C | -0.590437000 | 1.304846000  | -0.269974000 |
| H | -2.191014000 | 0.669247000  | -1.561788000 |
| H | -2.691182000 | 1.821170000  | -0.334685000 |
| C | 0.277324000  | 0.067466000  | -0.431590000 |
| H | -0.478043000 | 1.698950000  | 0.743985000  |
| H | -0.247265000 | 2.073411000  | -0.967232000 |
| N | 1.673499000  | 0.305587000  | -0.268116000 |
| O | -0.162084000 | -0.956813000 | 0.463855000  |
| C | -1.488044000 | -1.361368000 | 0.215178000  |
| C | -2.466532000 | -0.213445000 | 0.379400000  |
| H | -3.478595000 | -0.553411000 | 0.138710000  |
| H | 0.141675000  | -0.312119000 | -1.458997000 |
| H | -1.701591000 | -2.172792000 | 0.914728000  |
| H | -1.566058000 | -1.771146000 | -0.806346000 |
| H | -2.468991000 | 0.102180000  | 1.428353000  |
| C | 2.083170000  | 0.807954000  | 1.027009000  |
| C | 2.488257000  | -0.817665000 | -0.680384000 |
| H | 1.925912000  | 0.084787000  | 1.840766000  |
| H | 1.550233000  | 1.726398000  | 1.272907000  |
| H | 3.148051000  | 1.048908000  | 0.987487000  |
| H | 2.185889000  | -1.144839000 | -1.678005000 |
| H | 2.416471000  | -1.679204000 | -0.000215000 |
| H | 3.534815000  | -0.506708000 | -0.730036000 |

*Sum of electronic and zero-point Energies=* -405.187998  
*Sum of electronic and thermal Energies=* -405.178539  
*Sum of electronic and thermal Enthalpies=* -405.177595  
*Sum of electronic and thermal Free Energies=* -405.222014

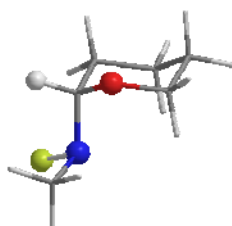

|   |              |              |              |
|---|--------------|--------------|--------------|
| C | 1.312864000  | -1.318439000 | -0.311774000 |
| O | 0.375557000  | -1.161353000 | 0.750220000  |
| H | 2.986521000  | -0.336196000 | -1.211491000 |
| H | 0.782298000  | -1.390187000 | -1.268909000 |
| C | -0.332168000 | 0.046304000  | 0.744636000  |
| H | 1.798769000  | -2.276150000 | -0.117138000 |
| N | -1.260138000 | 0.001391000  | -0.396011000 |
| C | 0.580047000  | 1.259405000  | 0.675598000  |
| C | 1.585063000  | 1.145346000  | -0.460461000 |
| C | 2.315586000  | -0.185489000 | -0.360487000 |
| H | -0.903963000 | 0.053360000  | 1.684118000  |
| H | -0.022794000 | 2.164042000  | 0.592350000  |

|   |              |              |              |
|---|--------------|--------------|--------------|
| H | 1.108610000  | 1.306486000  | 1.633378000  |
| H | 2.289474000  | 1.980378000  | -0.423201000 |
| H | 1.062702000  | 1.207722000  | -1.420180000 |
| H | 2.929758000  | -0.207446000 | 0.546755000  |
| C | -2.271120000 | -1.015895000 | -0.234417000 |
| F | -1.978529000 | 1.227216000  | -0.328188000 |
| H | -2.832904000 | -0.899342000 | 0.702189000  |
| H | -1.763247000 | -1.980057000 | -0.229768000 |
| H | -2.953585000 | -0.973863000 | -1.082675000 |

*Sum of electronic and zero-point Energies=* -465.081707  
*Sum of electronic and thermal Energies=* -465.072956  
*Sum of electronic and thermal Enthalpies=* -465.072012  
*Sum of electronic and thermal Free Energies=* -465.115222

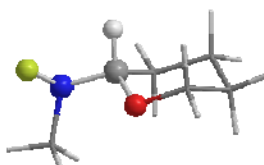

|   |              |              |              |
|---|--------------|--------------|--------------|
| C | -2.044819000 | 1.002510000  | -0.371489000 |
| C | -0.579175000 | 1.343699000  | -0.126679000 |
| H | -2.203577000 | 0.849498000  | -1.445931000 |
| H | -2.682476000 | 1.840210000  | -0.077823000 |
| C | 0.281954000  | 0.126938000  | -0.431762000 |
| H | -0.437542000 | 1.632201000  | 0.919567000  |
| H | -0.254551000 | 2.179118000  | -0.750415000 |
| N | 1.670828000  | 0.430743000  | -0.230947000 |
| O | -0.120249000 | -0.985283000 | 0.337766000  |
| C | -1.448565000 | -1.375247000 | 0.060870000  |
| C | -2.430739000 | -0.264367000 | 0.379498000  |
| H | -3.444329000 | -0.581811000 | 0.116963000  |
| H | 0.188561000  | -0.120521000 | -1.499452000 |
| H | -1.637290000 | -2.265475000 | 0.663664000  |
| H | -1.535550000 | -1.662373000 | -0.999589000 |
| H | -2.416538000 | -0.078120000 | 1.458732000  |
| C | 2.129970000  | 0.399717000  | 1.140192000  |
| F | 2.388020000  | -0.620094000 | -0.870048000 |
| H | 1.955976000  | -0.565315000 | 1.623110000  |
| H | 1.597158000  | 1.180594000  | 1.684956000  |
| H | 3.192416000  | 0.640400000  | 1.147376000  |

*Sum of electronic and zero-point Energies=* -465.083172  
*Sum of electronic and thermal Energies=* -465.074416  
*Sum of electronic and thermal Enthalpies=* -465.073471  
*Sum of electronic and thermal Free Energies=* -465.116544
